# Supplementary material
Source: publisher figshare collection journal article supplement (https://acs.figshare.com/ndownloader/files/3962308)

# **Asymmetric Rhodium(I)-Catalyzed C-C Activations with Zwitterionic *Bis*-Phospholane Ligands**

Evelyne Parker, and Nicolai Cramer\*

*Laboratory of Asymmetric Catalysis and Synthesis  
École Polytechnique Fédérale de Lausanne (EPFL)  
SB ISIC LCSA BCH 4305  
CH-1015 Lausanne, Switzerland*

*E-Mail: Nicolai.cramer@epfl.ch*

## **Supplementary Information**

### **Table of Content:**

|                             |        |
|-----------------------------|--------|
| <b>Experimental Section</b> | page 2 |
| <b>HPLC-Traces</b>          | page 5 |
| <b>NMR Spectra</b>          | page 9 |

### General procedure for substrates synthesis:

The required cyclobutanones were prepared according to the reported procedures:

- a) L. R. Krepski, A. Hassner *J. Org. Chem.* **1978**, *43*, 2879–2882;
- b) B. D. Johnston, E. Czyzewska, A. C. Oehlschlager *J. Org. Chem.*, **1987**, *52*, 3693–3697;
- c) W. Cao, I. Erden, R. H. Grow, J. R. Keeffe, J. Song, M. B. Trudell, T. L. Wadsworth, F. Xu, J. Zheng *Can. J. Chem.* **1999**, *77*, 1009;
- d) P. P. Shao, F. Ye *Tetrahedron Lett.* **2008**, *49*, 3554–3557;
- e) P. E. Pigou, C. H. Schiesser *J. Org. Chem.*, **1988**, *53*, 3841–3843;
- f) R. R. Galucci, R. Going *J. Org. Chem.* **1981**, *46*, 2532;
- g) K. Sugimoto, R. Hayashi, H. Nemoto, N. Toyooka, Y. Matsuya, *Org. Lett.* **2012**, *14*, 3510-3513.

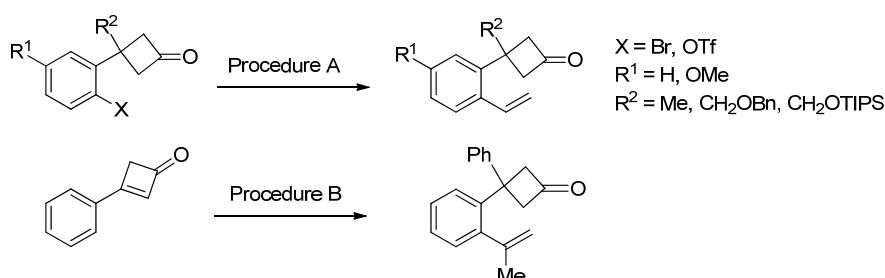

### **Procedure A (Suzuki coupling):**

A dried microwave vial was charged with the respective cyclobutanone (1 equiv.), Pd(OAc)<sub>2</sub> (10 mol%), dppf (12 mol%) and potassium vinyltrifluoroborate (3 equiv.). The system was sealed, evacuated and back filled with nitrogen. Dry and degassed mixture of dioxane / n-PrOH (ratio 2:1, 0.3M) and distilled triethylamine (3 equiv.) were added and the mixture was stirred at 110 °C for 6 h. The reaction mixture was filtered through a short pad of celite/silica and poured in sat. aq. NH<sub>4</sub>Cl. Aqueous layers were extracted with EtOAc (x3). Combined organic layers were washed with water and brine, dried over MgSO<sub>4</sub>, filtered and evaporated *in vacuo*. The residue was purified on a silica gel column eluting with the appropriate mixture of pentane/ethyl acetate to afford the desired product in 74–96% yield.

### **Procedure B (1,4 – addition):**

In a flame-dried Schlenk tube containing CuI (66.7 mg, 0.35 mmol) was added a freshly prepared (2-(prop-1-en-2-yl)phenyl)magnesium bromide (0.7 mL, 1.40 mmol, 2M solution in Et<sub>2</sub>O) at 0°C and the mixture was stirred for 10 min, then warmed up to room temperature and stirred for additional 10 min. A solution of 3-phenylcyclobut-2-enone (101 mg, 0.7 mmol) in Et<sub>2</sub>O (0.7 mL) was added dropwise at 0°C and the reaction mixture was gradually warmed up to room temperature over 3 h. The reaction mixture was carefully quenched at 0°C with aq. NH<sub>4</sub>Cl, extracted with Et<sub>2</sub>O (x3). The combined organic layers were washed with water and brine, dried over MgSO<sub>4</sub>, and evaporated *in vacuo*. The residue was purified on a silica gel column eluting with a mixture of pentane/ethyl acetate to afford the desired product (75 mg, 0.29 mmol) in 41% yield.

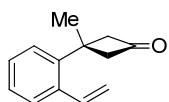

### 3-methyl-3-(2-vinylphenyl)cyclobutanone (11a)

$^1\text{H}$  NMR (400 MHz,  $\text{CDCl}_3$ )  $\delta$  = 7.53–7.51 (m, 1H), 7.31–7.26 (m, 2H), 7.22–7.19 (m, 1H), 6.86 (dd,  $^3J_{\text{H-H}} = 17.3$  Hz,  $^3J_{\text{H-H}} = 10.9$  Hz, 1H), 5.65 (d,  $^3J_{\text{H-H}} = 17.2$  Hz, 1H), 5.32 (d,  $^3J_{\text{H-H}} = 10.9$  Hz, 1H), 3.59–3.48 (m, 2H), 3.17–3.07 (m, 2H), 1.60 (s, 3H) ppm;  $^{13}\text{C}\{^1\text{H}\}$  NMR (101 MHz,  $\text{CDCl}_3$ )  $\delta$  = 206.9, 144.7, 136.1, 135.3, 128.0, 127.1, 127.0, 126.6, 116.1, 59.7, 34.4, 29.5 ppm; IR (ATR)  $\tilde{\nu}$  = 3061, 3025, 2957, 2921, 2865, 1781, 1480, 1444, 1378, 1271, 1183, 1144, 1080, 1057, 993, 915, 757, 650, 551, 477, 427  $\text{cm}^{-1}$ ; HRMS (ESI)  $m/z$  calc'd. for  $[\text{C}_{13}\text{H}_{15}\text{O}]^+$ : 187.1117, found: 187.1117;  $R_f$  = 0.53 (Pentane/Ethyl Acetate 9:1).

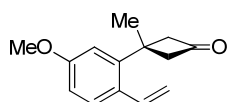

### 3-(5-methoxy-2-vinylphenyl)-3-methylcyclobutanone (11b)

$^1\text{H}$  NMR (400 MHz,  $\text{CDCl}_3$ )  $\delta$  = 7.47 (d,  $^3J_{\text{H-H}} = 8.7$  Hz, 1H), 6.85–6.72 (m, 3H), 5.54 (dd,  $^3J_{\text{H-H}} = 17.2$  Hz,  $^2J_{\text{H-H}} = 1.4$  Hz, 1H), 5.21 (dd,  $^3J_{\text{H-H}} = 10.9$  Hz,  $^2J_{\text{H-H}} = 1.4$  Hz, 1H), 3.83 (s, 3H), 3.56–3.47 (m, 2H), 3.15–3.05 (m, 2H), 1.59 (s, 3H) ppm;  $^{13}\text{C}\{^1\text{H}\}$  NMR (101 MHz,  $\text{CDCl}_3$ )  $\delta$  = 206.8, 159.3, 146.2, 134.6, 128.8, 128.4, 114.2, 113.0, 111.6, 9.6, 55.3, 34.5, 29.4 ppm; IR (ATR)  $\tilde{\nu}$  = 3085, 2957, 2921, 2865, 2836, 1779, 1603, 1566, 1485, 1466, 1379, 1325, 1294, 1230, 1185, 1144, 1064, 1046, 1025, 992, 908, 868, 816, 730, 544, 464, 439  $\text{cm}^{-1}$ ; HRMS (ESI)  $m/z$  calc'd. for  $[\text{C}_{14}\text{H}_{17}\text{O}_2]^+$ : 217.1223, found: 217.1227;  $R_f$  = 0.37 (Pentane/Ethyl Acetate 9:1).

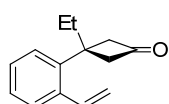

### 3-ethyl-3-(2-vinylphenyl)cyclobutanone (11c)

$^1\text{H}$  NMR (400 MHz,  $\text{CDCl}_3$ )  $\delta$  = 7.57 – 7.48 (m, 1H), 7.29–7.23 (m, 2H), 7.15–7.04 (m, 1H), 6.86 (dd,  $^3J_{\text{H-H}} = 17.3$  Hz,  $^3J_{\text{H-H}} = 10.9$  Hz, 1H), 5.62 (dd,  $^3J_{\text{H-H}} = 17.3$  Hz,  $^2J_{\text{H-H}} = 1.4$  Hz, 1H), 5.29 (dd,  $^3J_{\text{H-H}} = 10.9$  Hz,  $^2J_{\text{H-H}} = 1.4$  Hz, 1H), 3.54–3.40 (m, 2H), 3.20–3.09 (m, 2H), 1.91 (q,  $^2J_{\text{H-H}} = 7.3$  Hz, 2H), 0.76 (t,  $^2J_{\text{H-H}} = 7.3$  Hz, 3H) ppm;  $^{13}\text{C}\{^1\text{H}\}$  NMR (101 MHz,  $\text{CDCl}_3$ )  $\delta$  = 207.1, 142.2, 136.4, 135.4, 128.4, 127.3, 127.2, 127.0, 115.9, 57.9, 38.5, 33.6, 9.8 ppm; IR (ATR)  $\tilde{\nu}$  = 3061, 2964, 2921, 2853, 1779, 1480, 1460, 1381, 1314, 1181, 1142, 1117, 1080, 993, 772, 755, 431  $\text{cm}^{-1}$ ; HRMS (ESI)  $m/z$  calc'd. for  $[\text{C}_{14}\text{H}_{17}\text{O}]^+$ : 201.1274, found: 201.1274;  $R_f$  = 0.56 (Pentane/Ethyl Acetate 9:1).

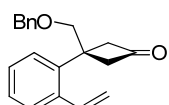

### 3-((benzyloxy)methyl)-3-(2-vinylphenyl)cyclobutanone (11d)

$^1\text{H}$  NMR (400 MHz,  $\text{CDCl}_3$ )  $\delta$  = 7.57–7.45 (m, 1H), 7.36–7.24 (m, 5H), 7.25–7.15 (m, 3H), 6.82 (dd,  $^3J_{\text{H-H}} = 17.3$  Hz,  $^3J_{\text{H-H}} = 10.9$  Hz, 1H), 5.60 (dd,  $^3J_{\text{H-H}} = 17.3$  Hz,  $^2J_{\text{H-H}} = 1.4$  Hz, 1H), 5.27

(dd,  $^3J_{H-H} = 10.9$  Hz,  $^2J_{H-H} = 1.4$  Hz, 1H), 4.51 (s, 2H), 3.66 (d,  $^2J_{H-H} = 1.4$  Hz, 2H), 3.42 (d,  $^2J_{H-H} = 1.5$  Hz, 4H) ppm;  $^{13}\text{C}\{^1\text{H}\}$  NMR (101 MHz,  $\text{CDCl}_3$ )  $\delta = 205.8, 140.7, 137.9, 137.0, 135.4, 128.3, 128.3, 127.8, 127.6, 127.5, 127.4, 127.3, 127.1, 116.2, 76.2, 73.2, 55.8, 38.8$  ppm; IR (ATR)  $\tilde{\nu} = 3062, 3028, 2921, 2854, 1782, 1480, 1453, 1374, 1241, 1205, 1090, 1027, 989, 908, 758, 729, 697, 649, 477, 431$   $\text{cm}^{-1}$ ; HRMS (ESI)  $m/z$  calc'd. for  $[\text{C}_{20}\text{H}_{21}\text{O}_2]^+$ : 293.1536, found: 293.1534;  $R_f = 0.39$  (Pentane/Ethyl Acetate 9:1).

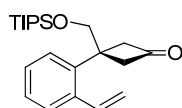

**3-(((triisopropylsilyl)oxy)methyl)-3-(2-vinylphenyl)cyclobutanone (11e)**

$^1\text{H}$  NMR (400 MHz,  $\text{CDCl}_3$ )  $\delta = 7.56\text{--}7.46$  (m, 1H), 7.31–7.27 (m, 2H), 7.24–7.15 (m, 1H), 6.85 (dd,  $^3J_{H-H} = 17.3$  Hz,  $^3J_{H-H} = 10.9$  Hz, 1H), 5.62 (dd,  $^3J_{H-H} = 17.3$  Hz,  $^2J_{H-H} = 1.5$  Hz, 1H), 5.31 (dd,  $^3J_{H-H} = 10.9$  Hz,  $^2J_{H-H} = 1.5$  Hz, 1H), 3.90 (d,  $^2J_{H-H} = 1.8$  Hz, 2H), 3.49 – 3.35 (m, 4H), 1.14–0.93 (m, 21H) ppm;  $^{13}\text{C}\{^1\text{H}\}$  NMR (101 MHz,  $\text{CDCl}_3$ )  $\delta = 205.8, 140.6, 137.1, 135.5, 128.4, 127.7, 127.5, 127.1, 116.3, 69.9, 55.1, 40.3, 17.9, 11.9$  ppm; IR (ATR)  $\tilde{\nu} = 2941, 2891, 2865, 1787, 1462, 1383, 1373, 1110, 1090, 1068, 1013, 994, 915, 881, 801, 756, 682, 660, 475$   $\text{cm}^{-1}$ ; HRMS (ESI)  $m/z$  calc'd. for  $[\text{C}_{22}\text{H}_{35}\text{O}_2\text{Si}]^+$ : 359.2401, found: 359.2395;  $R_f = 0.67$  (Pentane/Ethyl Acetate 9:1).

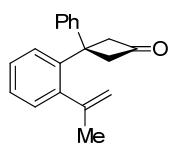

**3-phenyl-3-(2-(prop-1-en-2-yl)phenyl)cyclobutanone (11f)**

$^1\text{H}$  NMR (400 MHz,  $\text{CDCl}_3$ )  $\delta = 7.45\text{--}7.11$  (m, 9H), 4.95 (dq,  $^3J_{H-H} = 2.0$  Hz,  $^4J_{H-H} = 1.6$  Hz, 1H), 4.45 (dq,  $^2J_{H-H} = 2.0$  Hz,  $^4J_{H-H} = 1.0$  Hz, 1H), 3.87–3.78 (m, 2H), 3.62–3.53 (m, 2H), 1.79 (dd,  $^4J_{H-H} = 1.6$  Hz,  $^4J_{H-H} = 1.0$  Hz, 3H) ppm;  $^{13}\text{C}\{^1\text{H}\}$  NMR (101 MHz,  $\text{CDCl}_3$ )  $\delta = 207.0, 148.5, 145.0, 143.3, 142.8, 129.9, 129.4, 128.5, 127.0, 126.8, 126.2, 125.8, 116.6, 61.7, 41.8, 25.3$  ppm; IR (ATR)  $\tilde{\nu} = 3058, 3020, 2973, 2915, 1780, 1639, 1599, 1495, 1446, 1375, 1121, 1082, 1023, 905, 758, 700, 658, 560, 549, 483$   $\text{cm}^{-1}$ ; HRMS (ESI)  $m/z$  calc'd. for  $[\text{C}_{19}\text{H}_{19}\text{O}]^+$ : 263.1430, found: 263.1428;  $R_f = 0.56$  (Pentane/Ethyl Acetate 9:1).

### HPLC-Traces for ketones 14:

#### **(5*S*,9*R*)-5-methyl-8,9-dihydro-5*H*-5,9-methanobenzo[7]annulen-7(6*H*)-one (14a)**

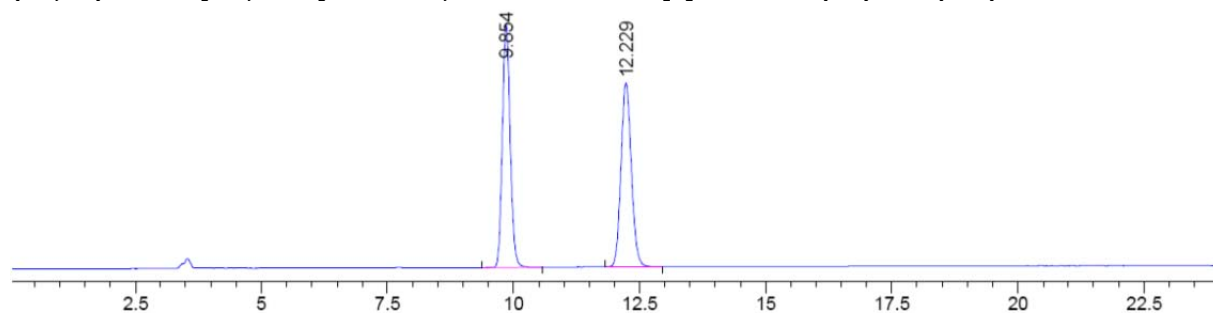

| Peak # | RetTime [min] | Type | Width [min] | Area [mAU*s] | Height [mAU] | Area %  |
|--------|---------------|------|-------------|--------------|--------------|---------|
| 1      | 9.854         | BB   | 0.1665      | 439.54361    | 40.53133     | 50.1100 |
| 2      | 12.229        | BB   | 0.2227      | 437.61340    | 30.61999     | 49.8900 |

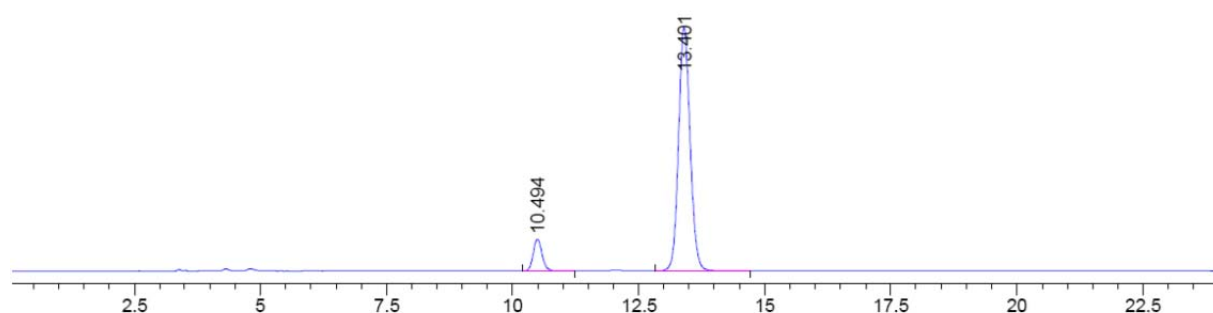

| Peak # | RetTime [min] | Type | Width [min] | Area [mAU*s] | Height [mAU] | Area %  |
|--------|---------------|------|-------------|--------------|--------------|---------|
| 1      | 10.494        | BB   | 0.1881      | 71.67528     | 5.96901      | 8.9185  |
| 2      | 13.401        | BB   | 0.2467      | 731.99146    | 45.74722     | 91.0815 |

#### **(5*S*,9*R*)-2-methoxy-9-methyl-8,9-dihydro-5*H*-5,9-methanobenzo[7]annulen-7(6*H*)-one (14b)**

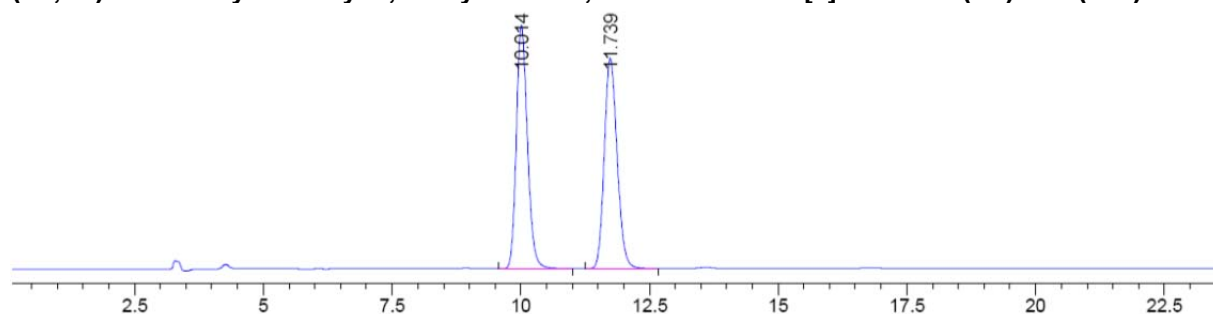

| Peak # | RetTime [min] | Type | Width [min] | Area [mAU*s] | Height [mAU] | Area %  |
|--------|---------------|------|-------------|--------------|--------------|---------|
| 1      | 10.014        | BB   | 0.2308      | 2124.07031   | 141.74341    | 50.0204 |
| 2      | 11.739        | BB   | 0.2680      | 2122.33618   | 122.57774    | 49.9796 |

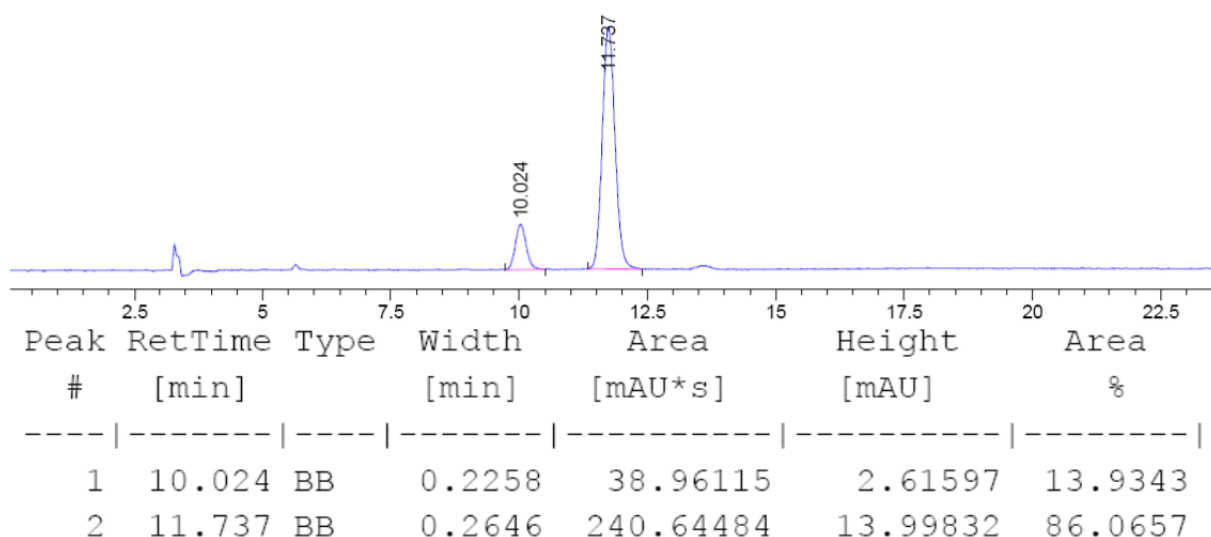

**(5*S*,9*R*)-5-ethyl-8,9-dihydro-5*H*-5,9-methanobenzo[7]annulen-7(6*H*)-one (14c)**

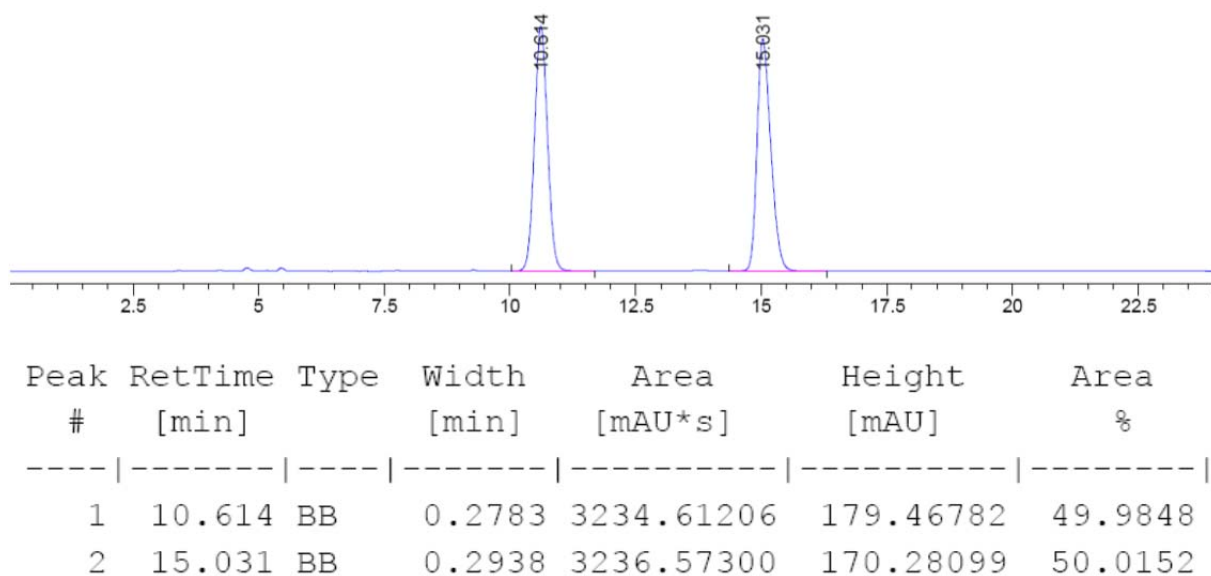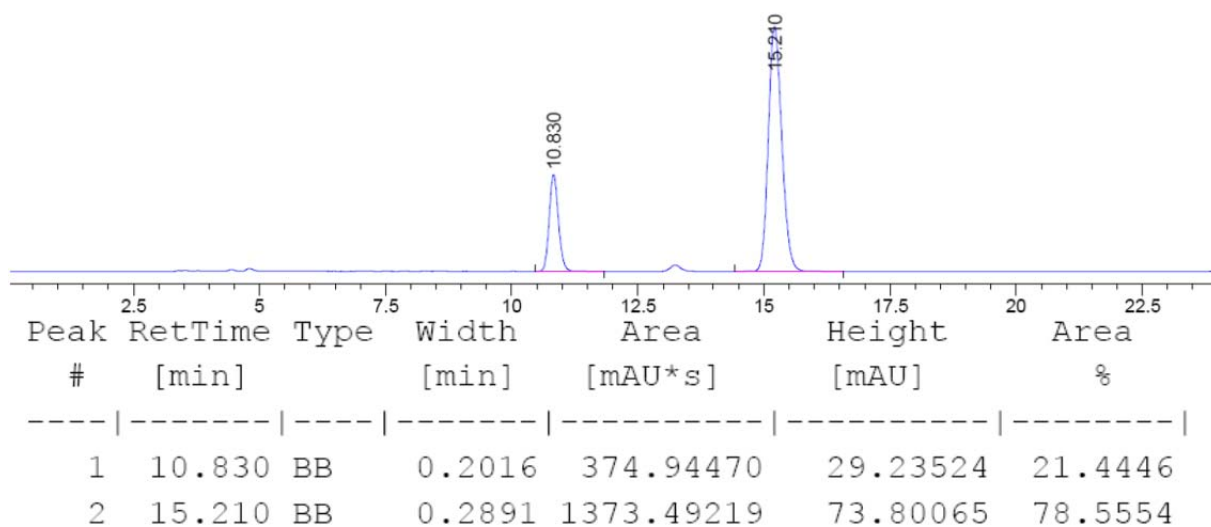

**(5*R*,9*R*)-5-((benzyloxy)methyl)-8,9-dihydro-5*H*-5,9-methanobenzo[7]annulen-7(6*H*)-one (14d)**

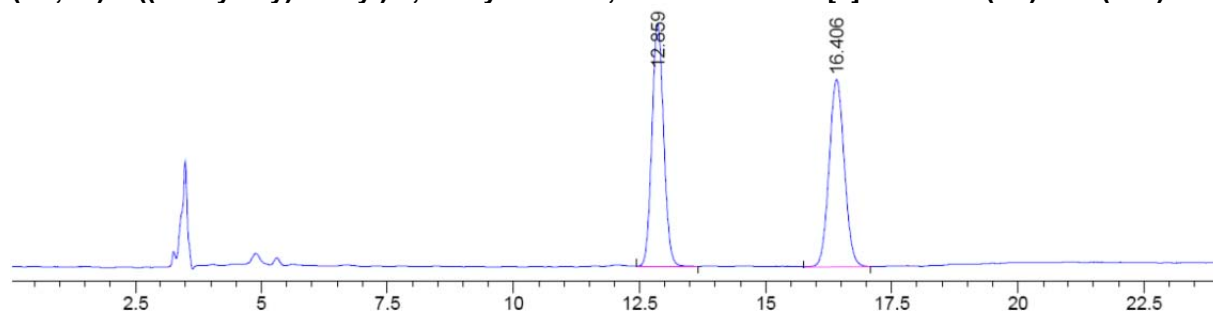

| Peak # | RetTime [min] | Type | Width [min] | Area [mAU*s] | Height [mAU] | Area %  |
|--------|---------------|------|-------------|--------------|--------------|---------|
| 1      | 12.859        | VB   | 0.2528      | 1453.04712   | 89.77430     | 50.0626 |
| 2      | 16.406        | BB   | 0.3287      | 1449.41553   | 69.10404     | 49.9374 |

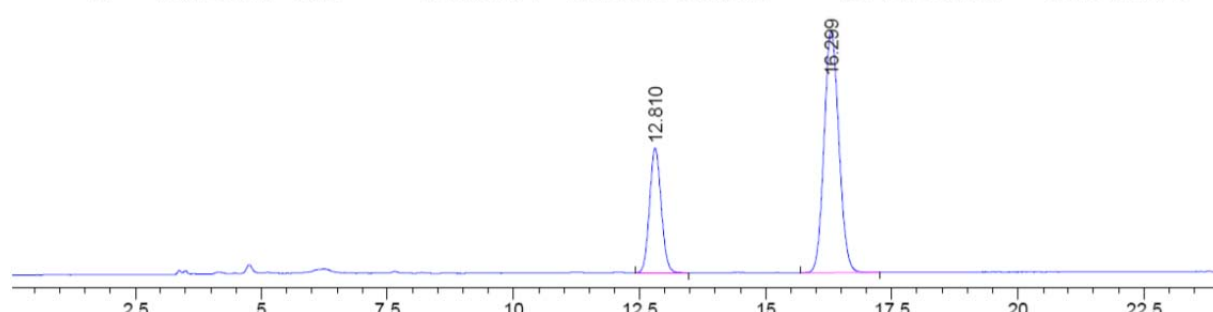

| Peak # | RetTime [min] | Type | Width [min] | Area [mAU*s] | Height [mAU] | Area %  |
|--------|---------------|------|-------------|--------------|--------------|---------|
| 1      | 12.810        | BB   | 0.2470      | 325.54828    | 20.31510     | 28.8265 |
| 2      | 16.299        | BB   | 0.3181      | 803.79028    | 39.38016     | 71.1735 |

**(5*R*,9*R*)-5-(((triisopropylsilyl)oxy)methyl)-8,9-dihydro-5*H*-5,9-methanobenzo[7]annulen-7(6*H*)-one (14e)**

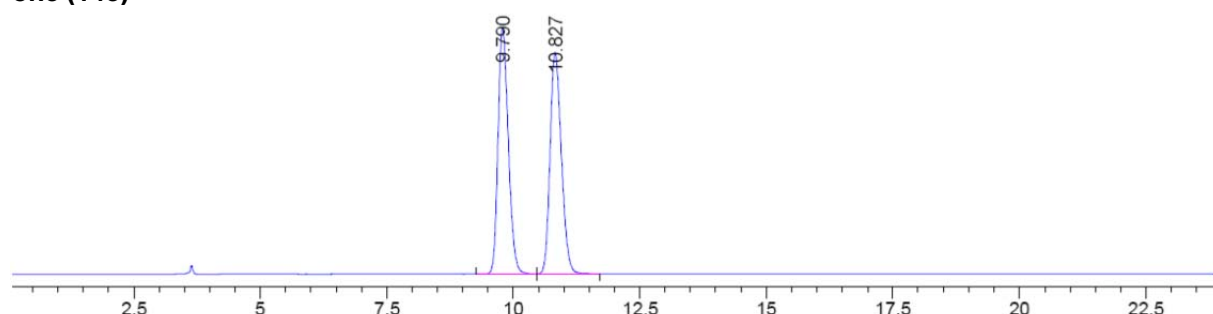

| Peak # | RetTime [min] | Type | Width [min] | Area [mAU*s] | Height [mAU] | Area %  |
|--------|---------------|------|-------------|--------------|--------------|---------|
| 1      | 9.790         | BB   | 0.2164      | 1770.25574   | 125.59419    | 50.2430 |
| 2      | 10.827        | BB   | 0.2409      | 1753.13440   | 113.06232    | 49.7570 |

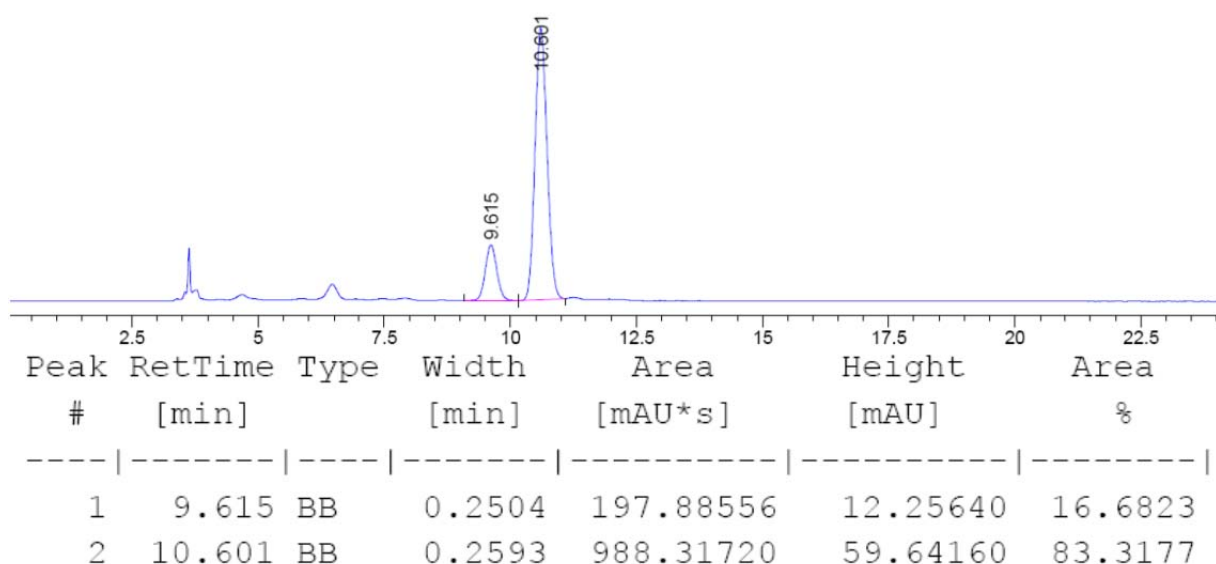

**(5S,9S)-5-methyl-9-phenyl-8,9-dihydro-5H-5,9-methanobenzo[7]annulen-7(6H)-one (14f)**

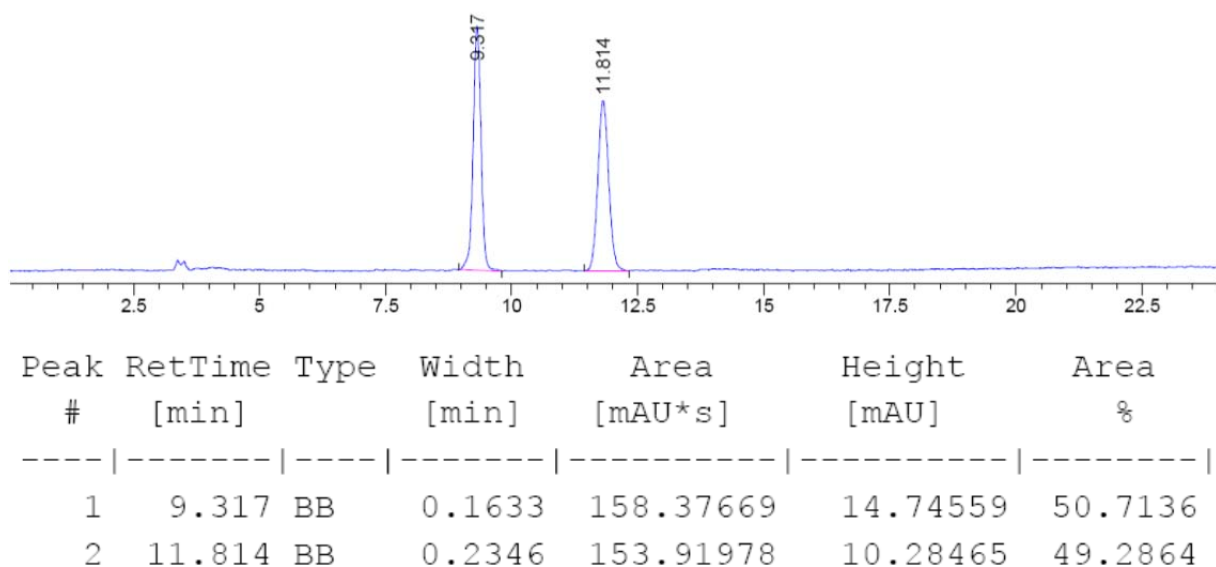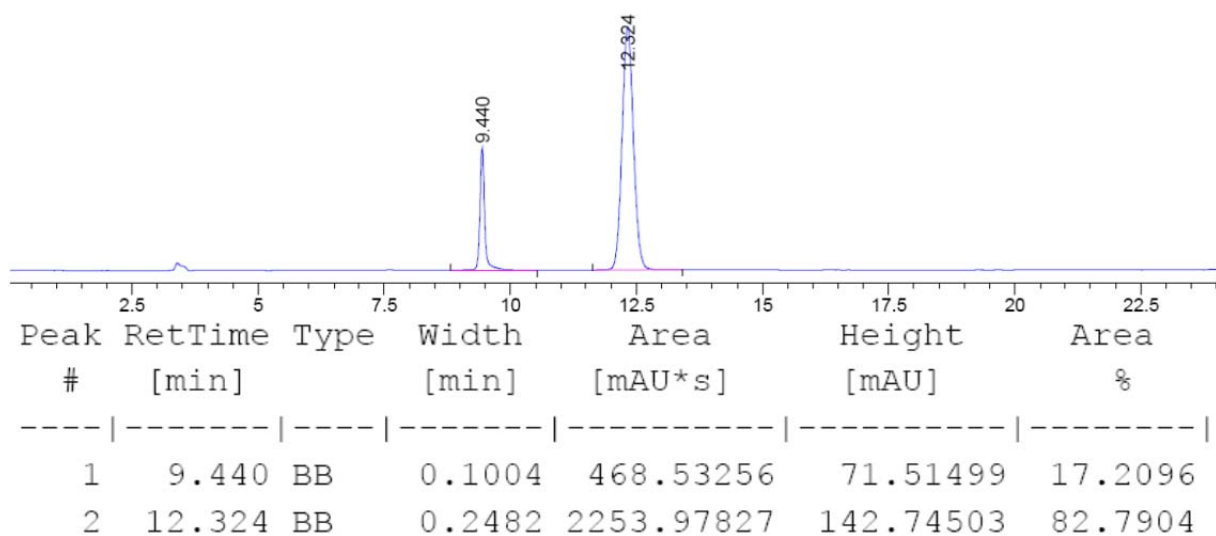



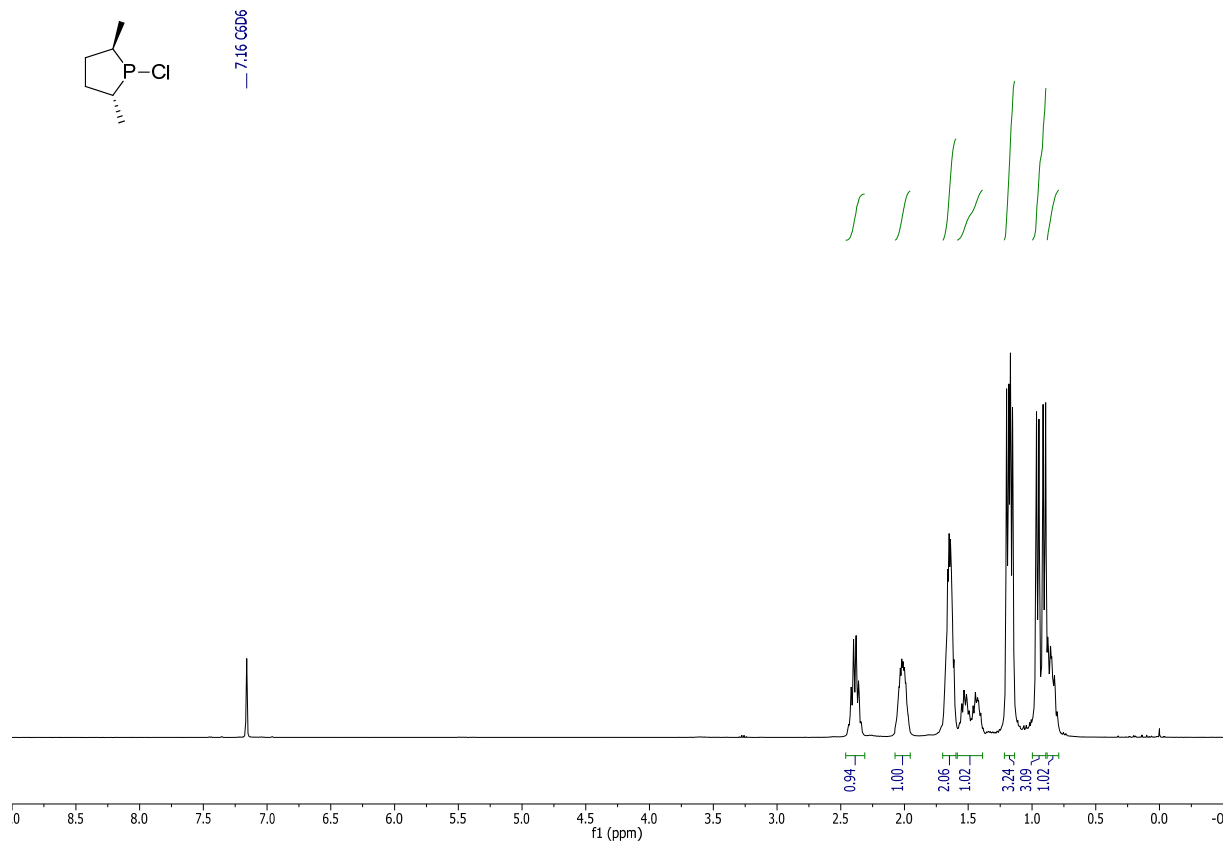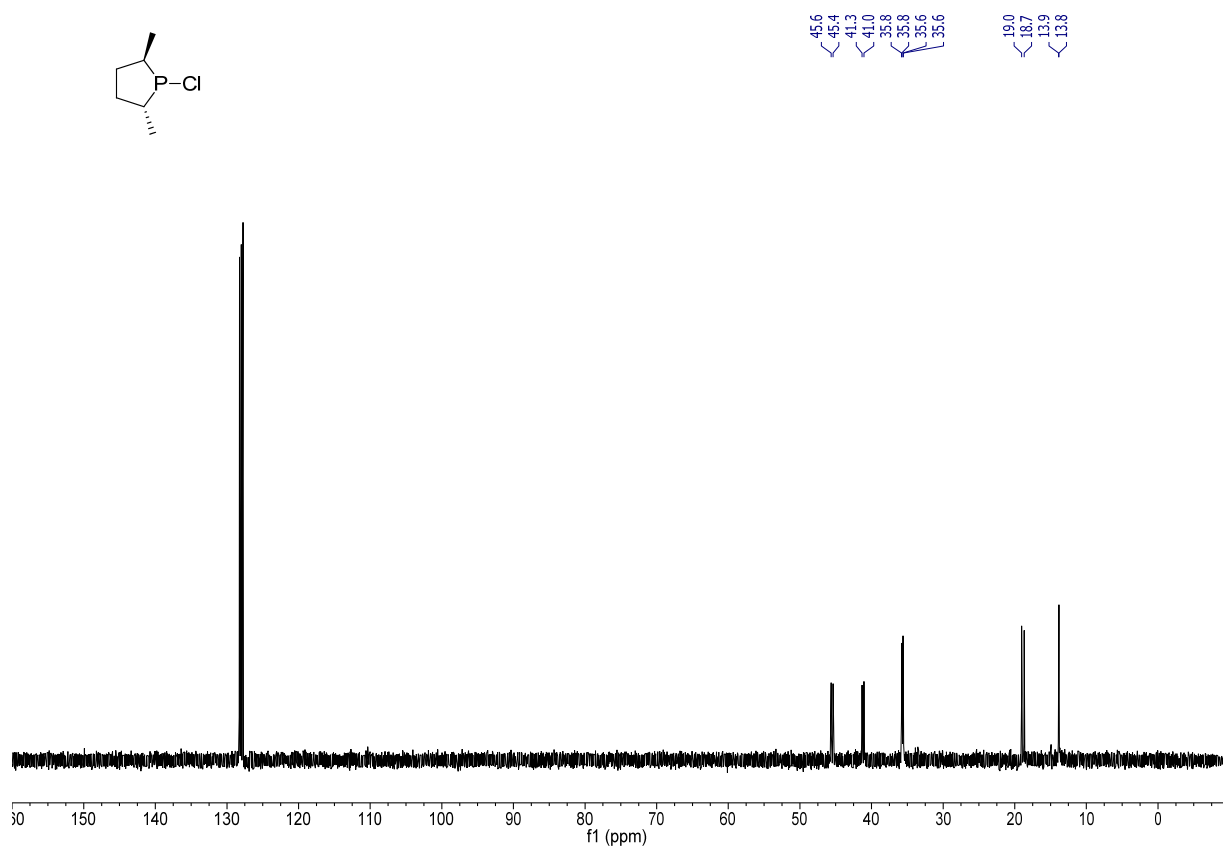

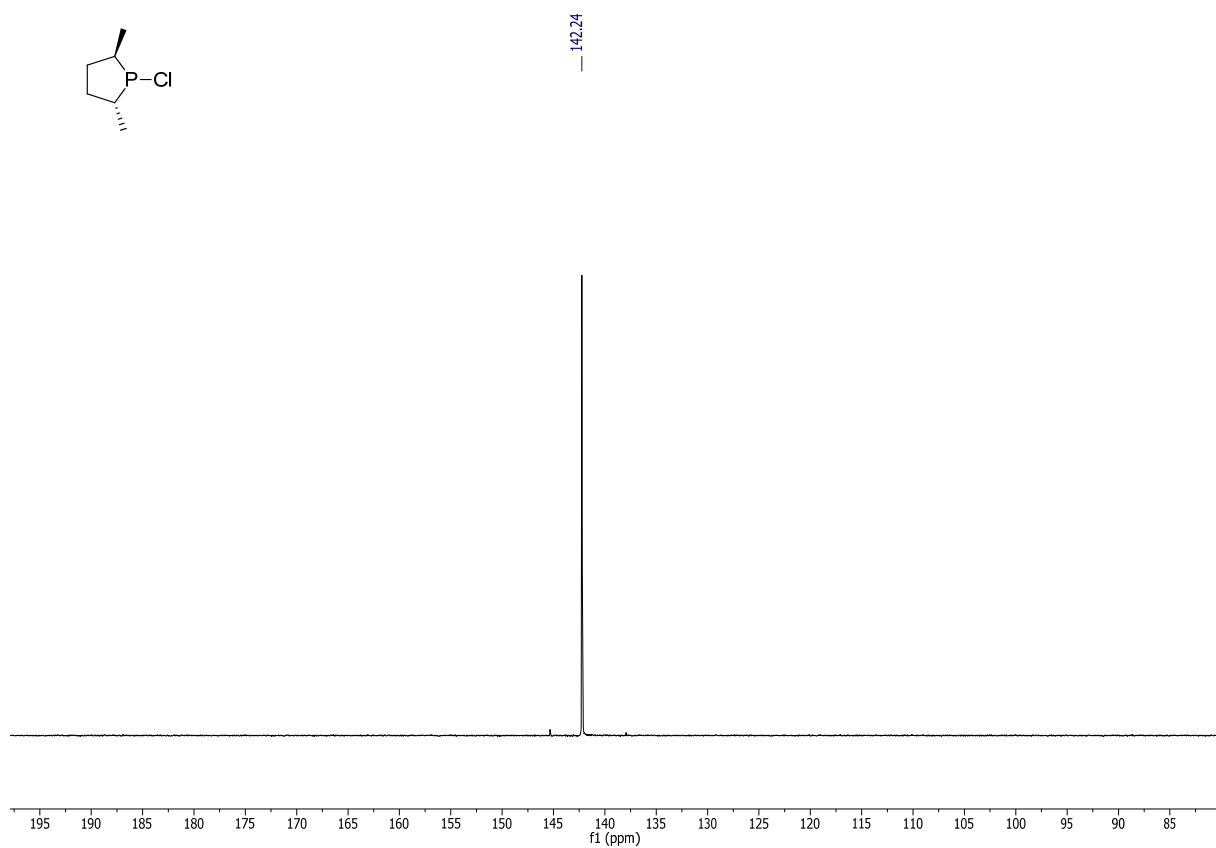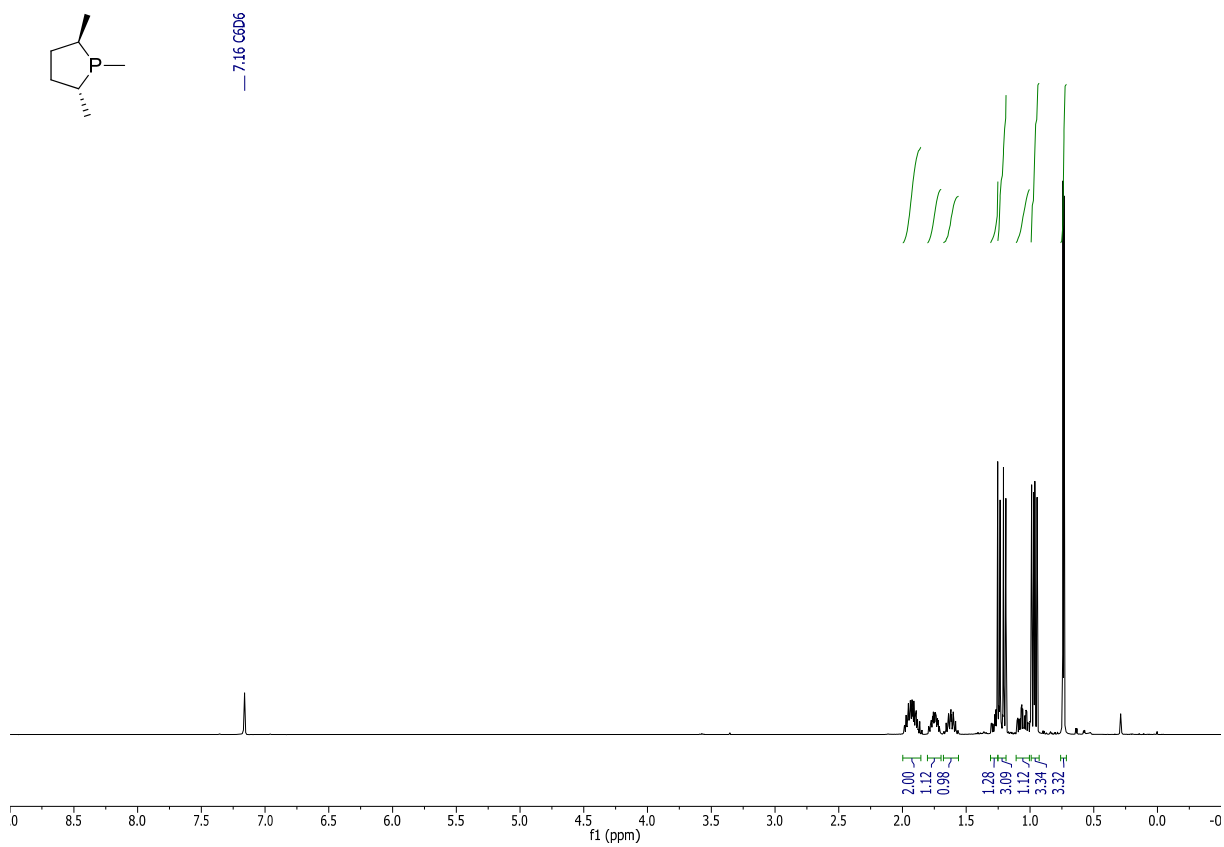

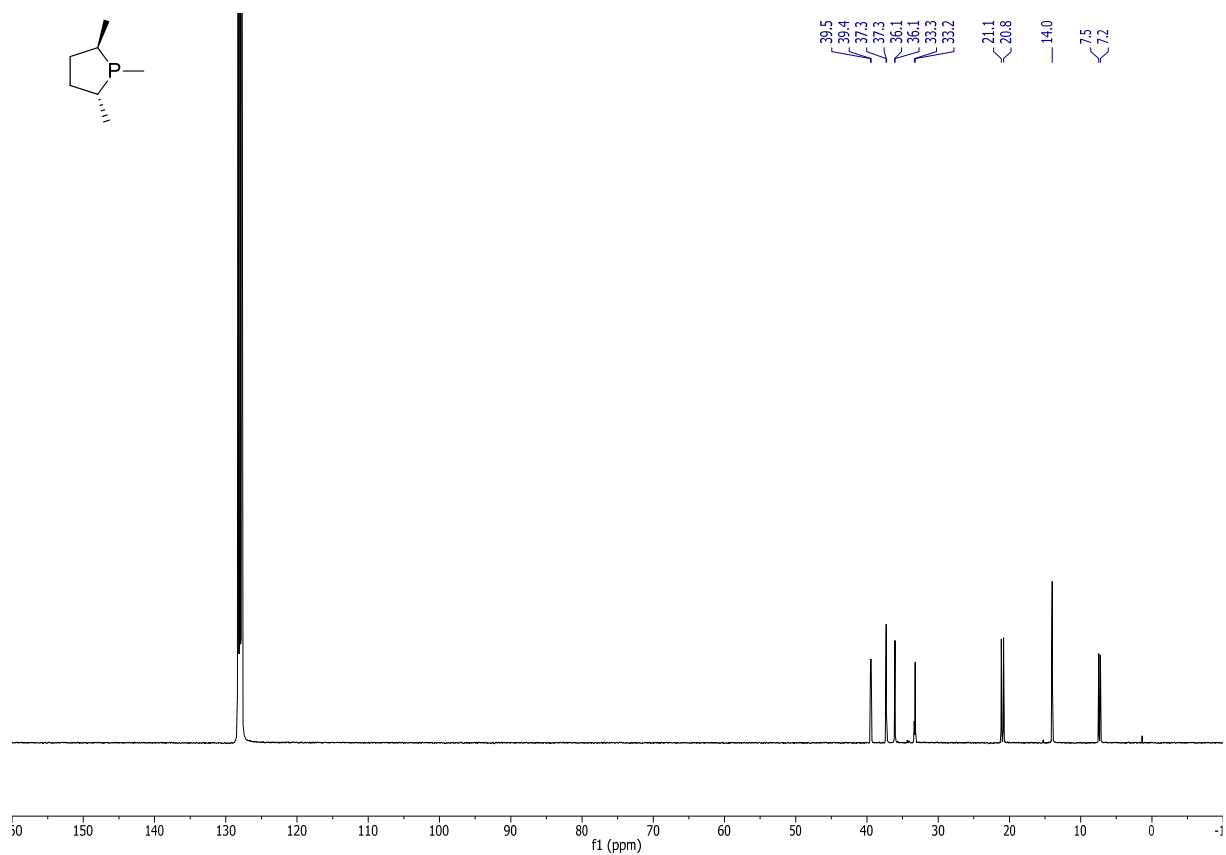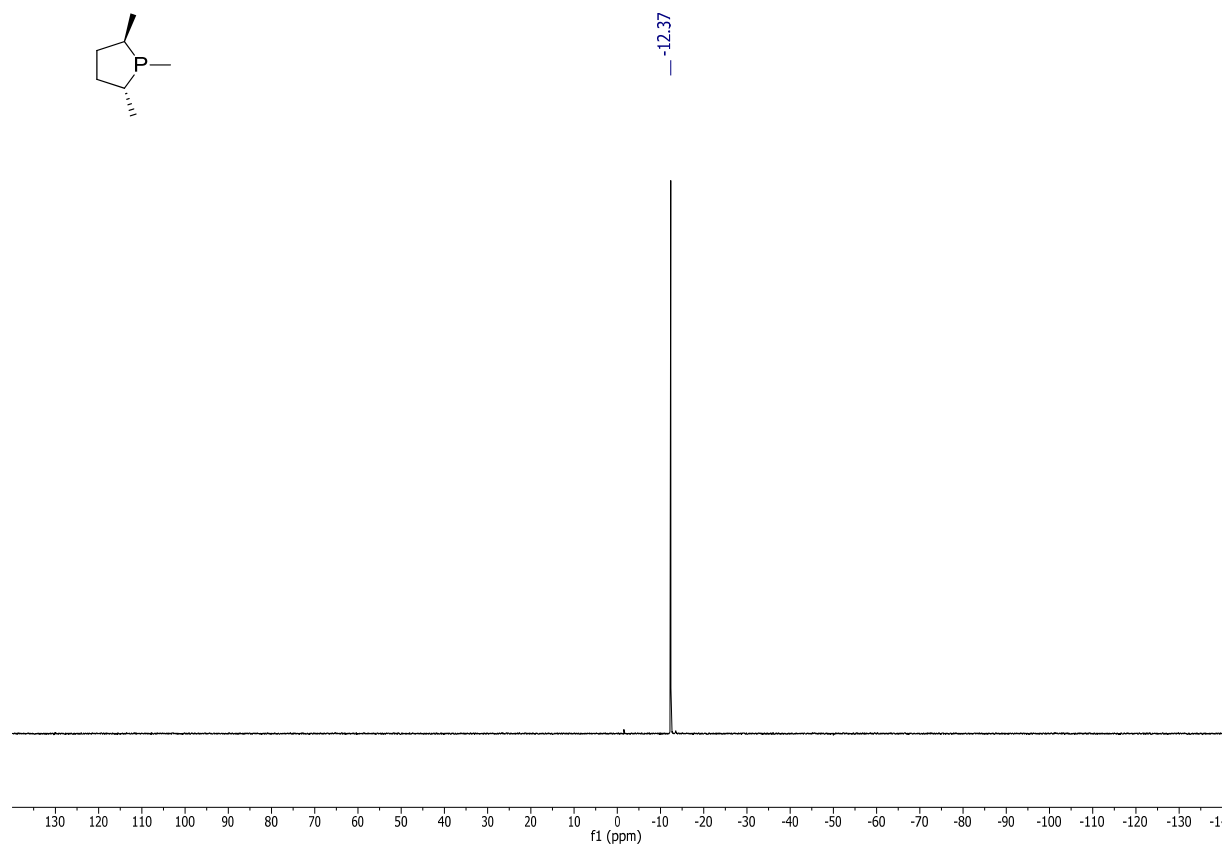

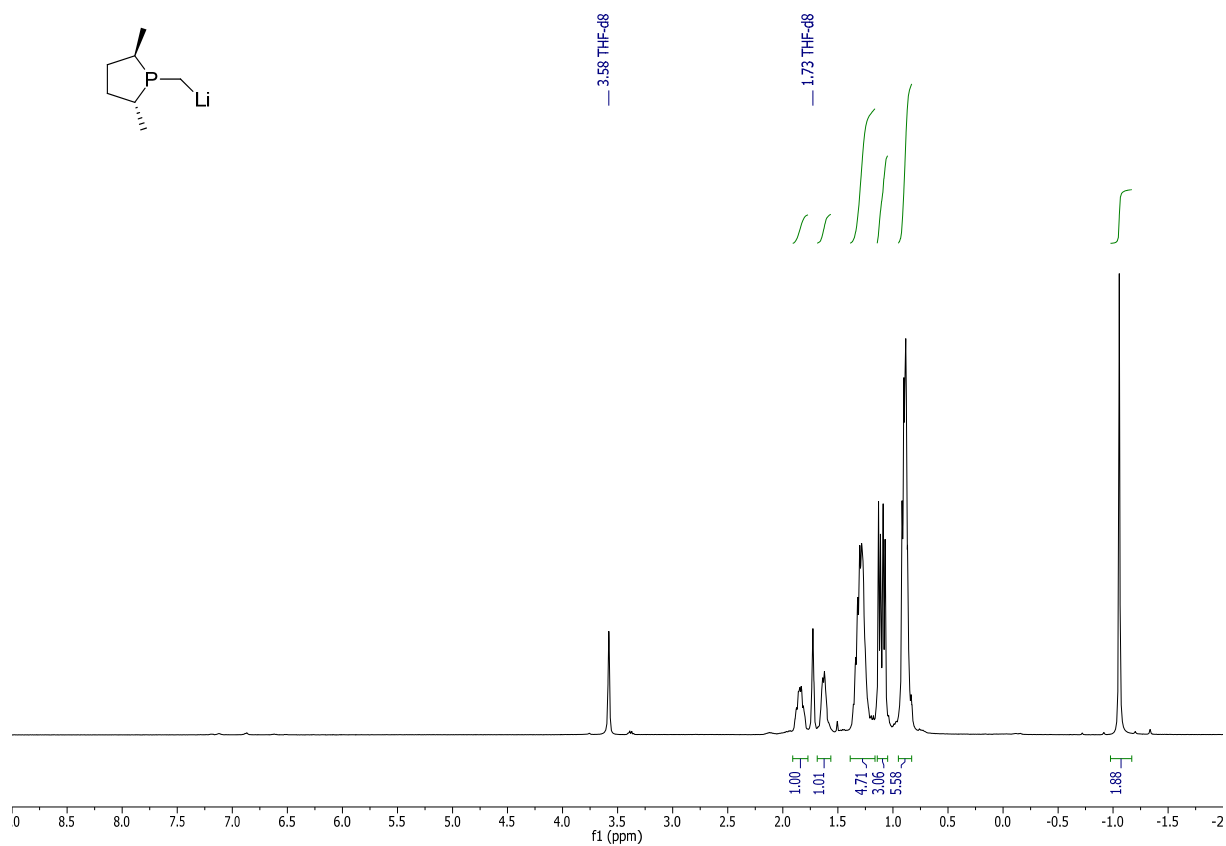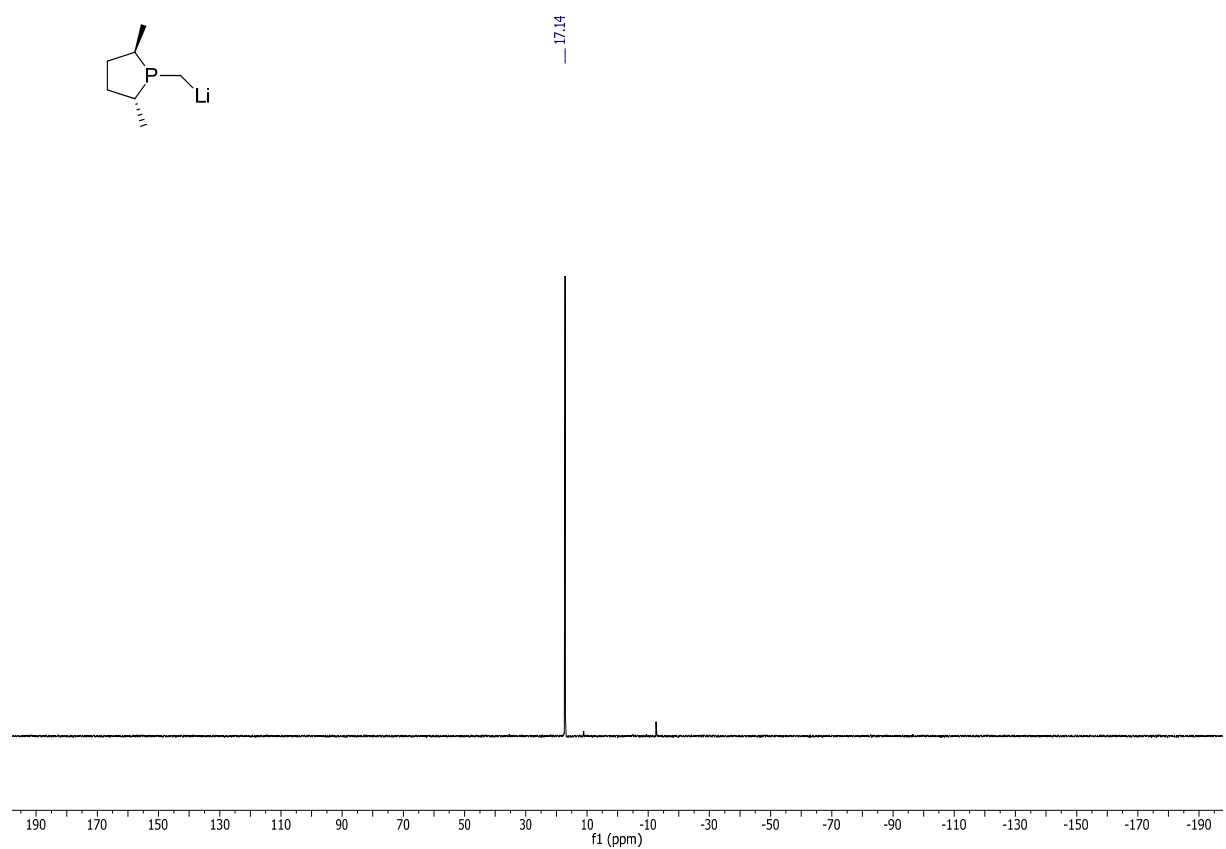

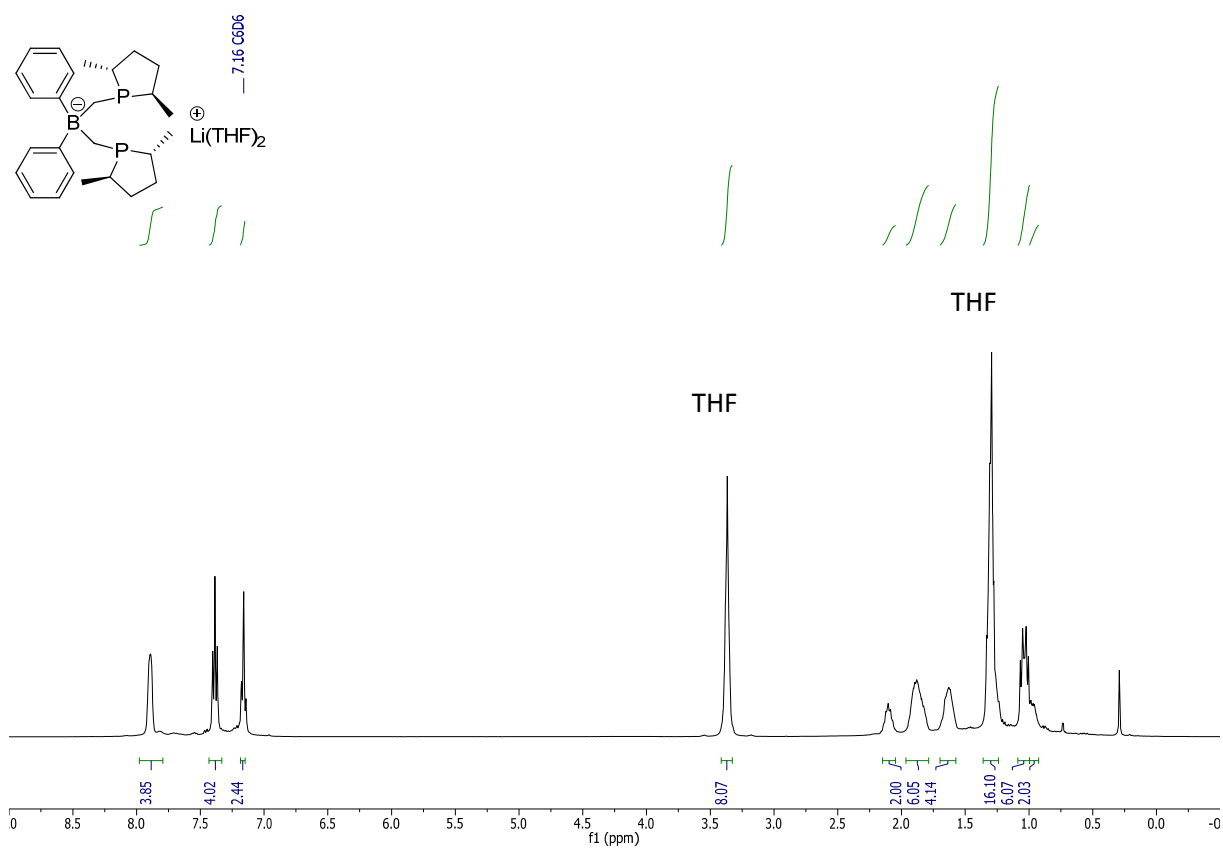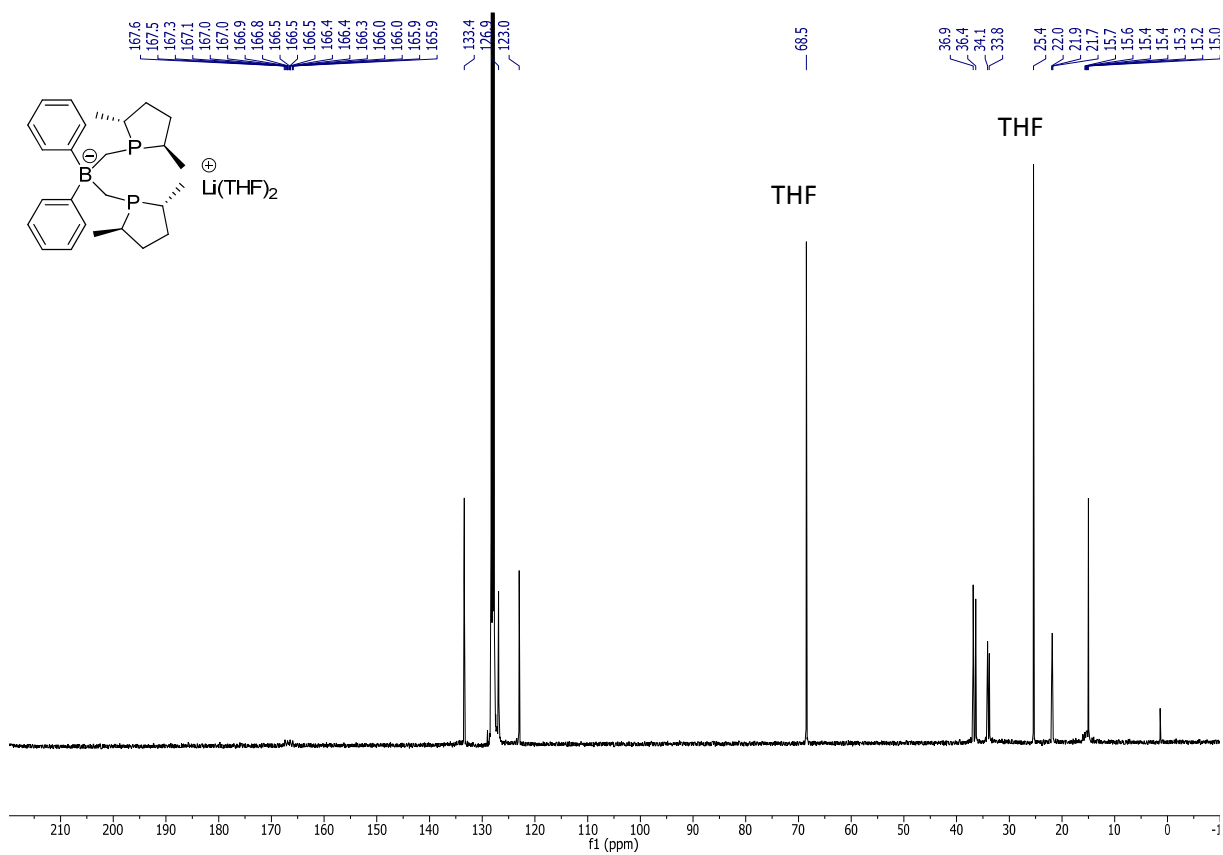

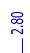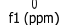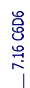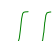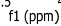

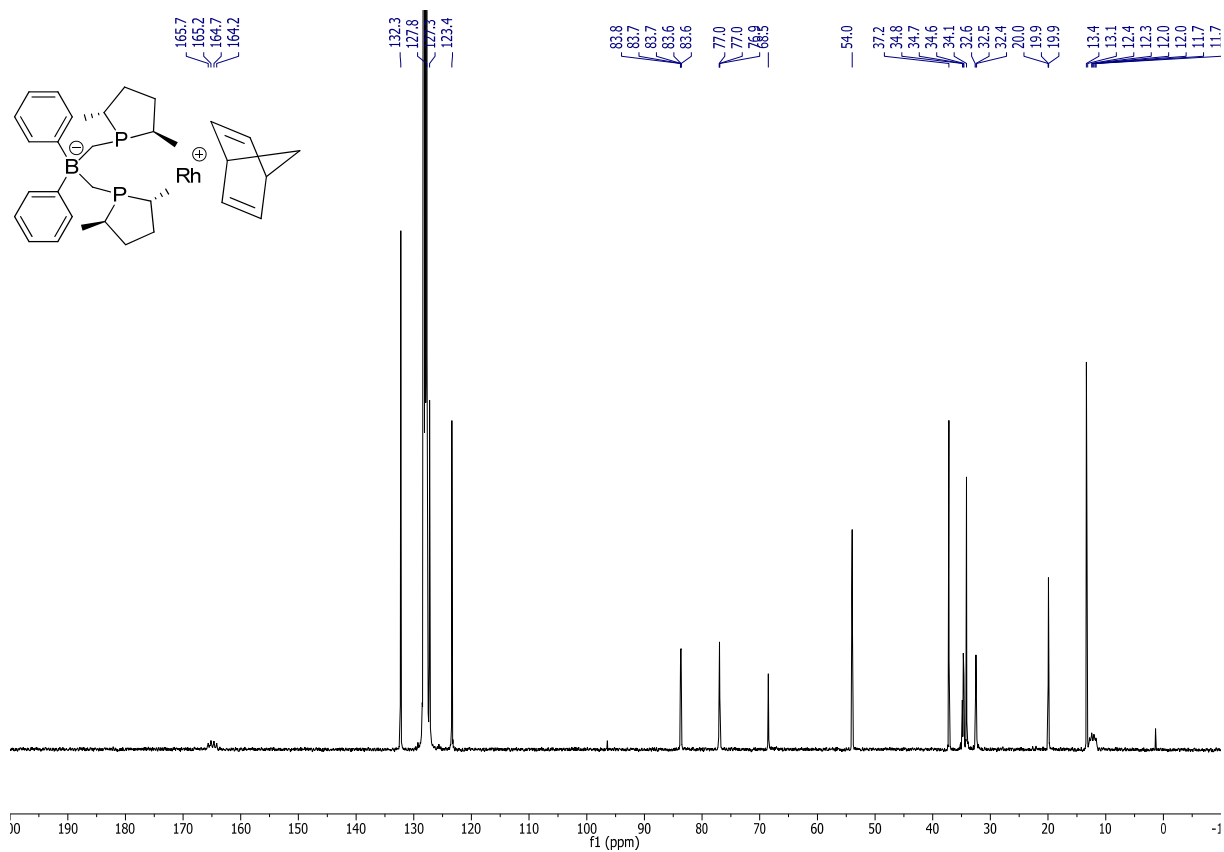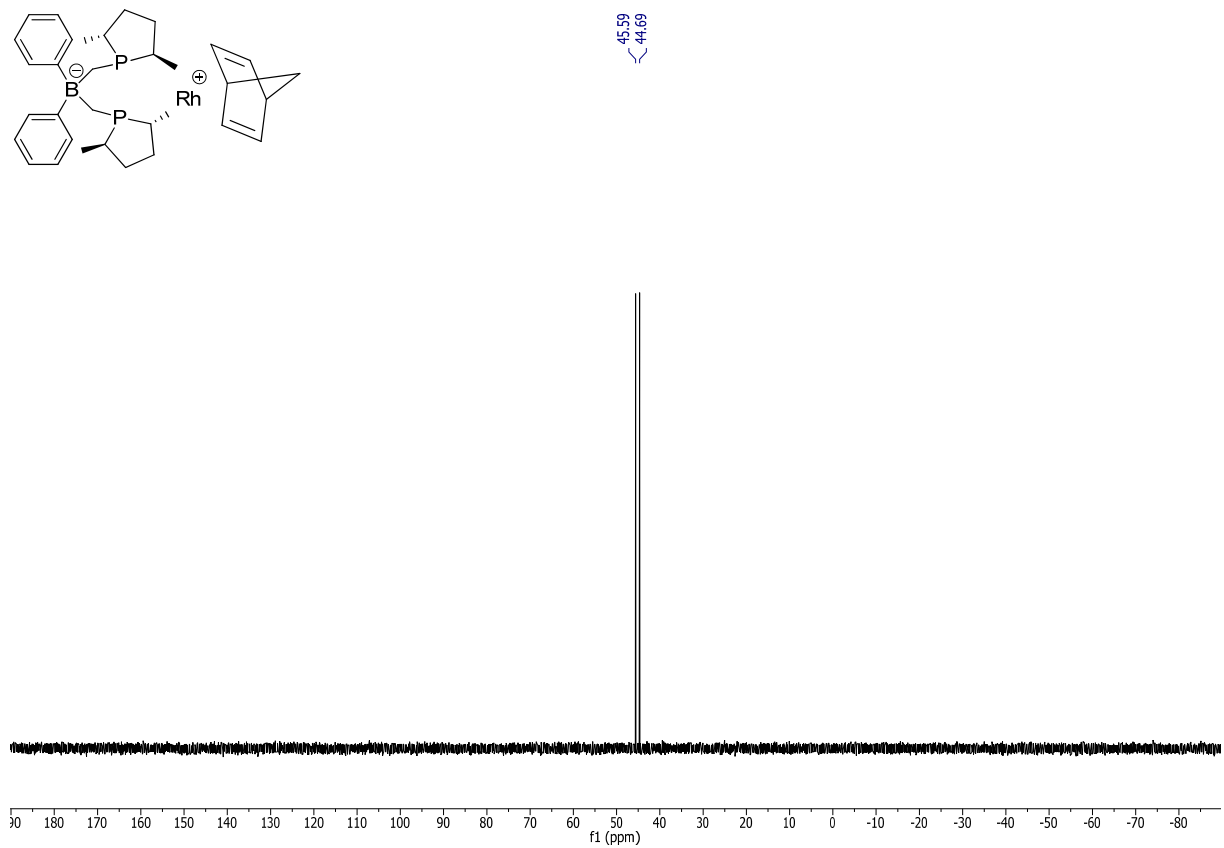

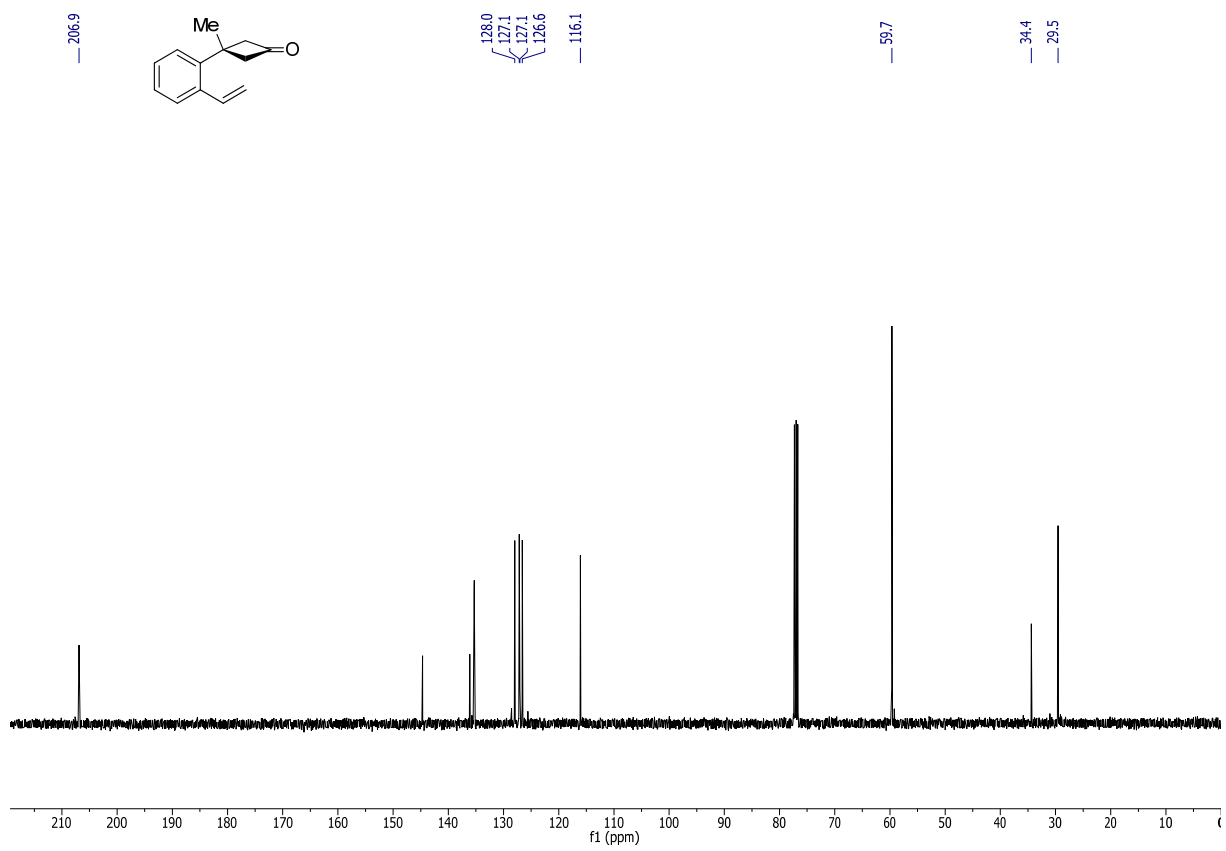



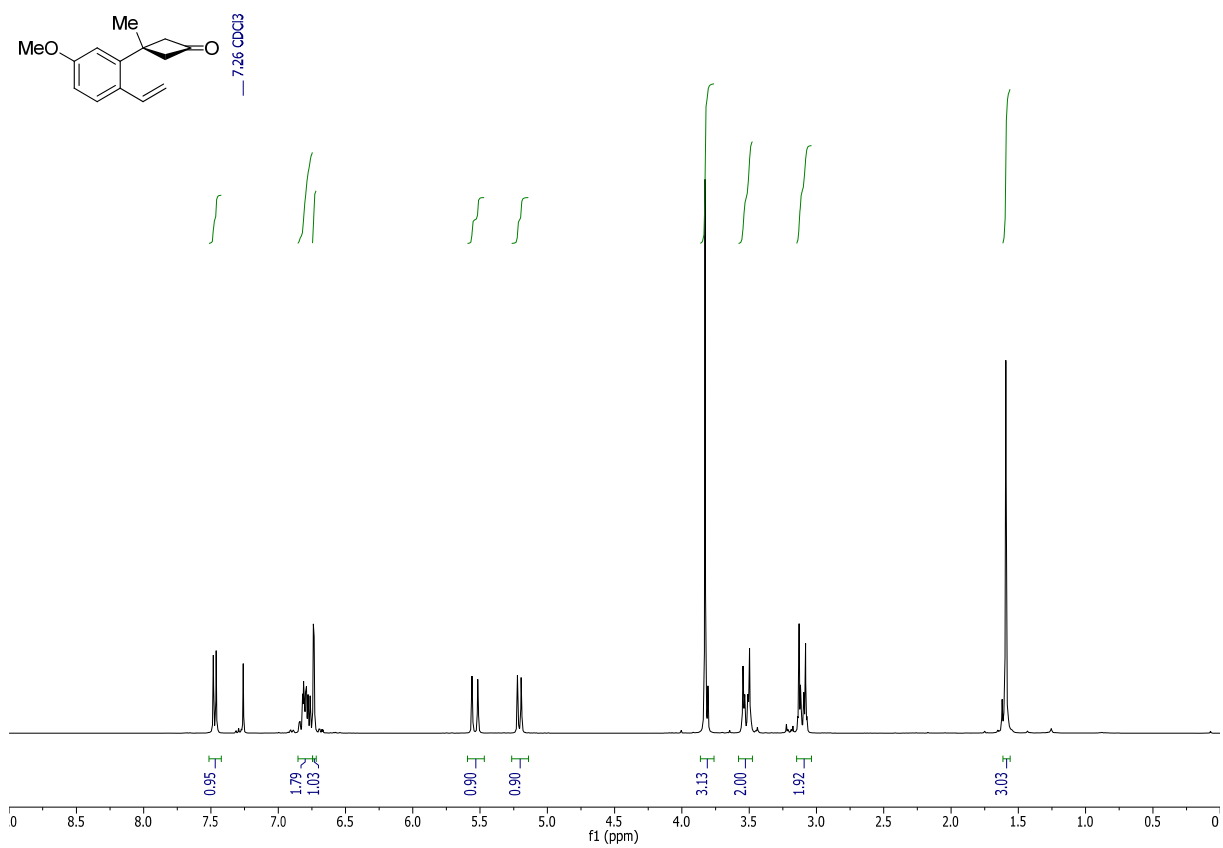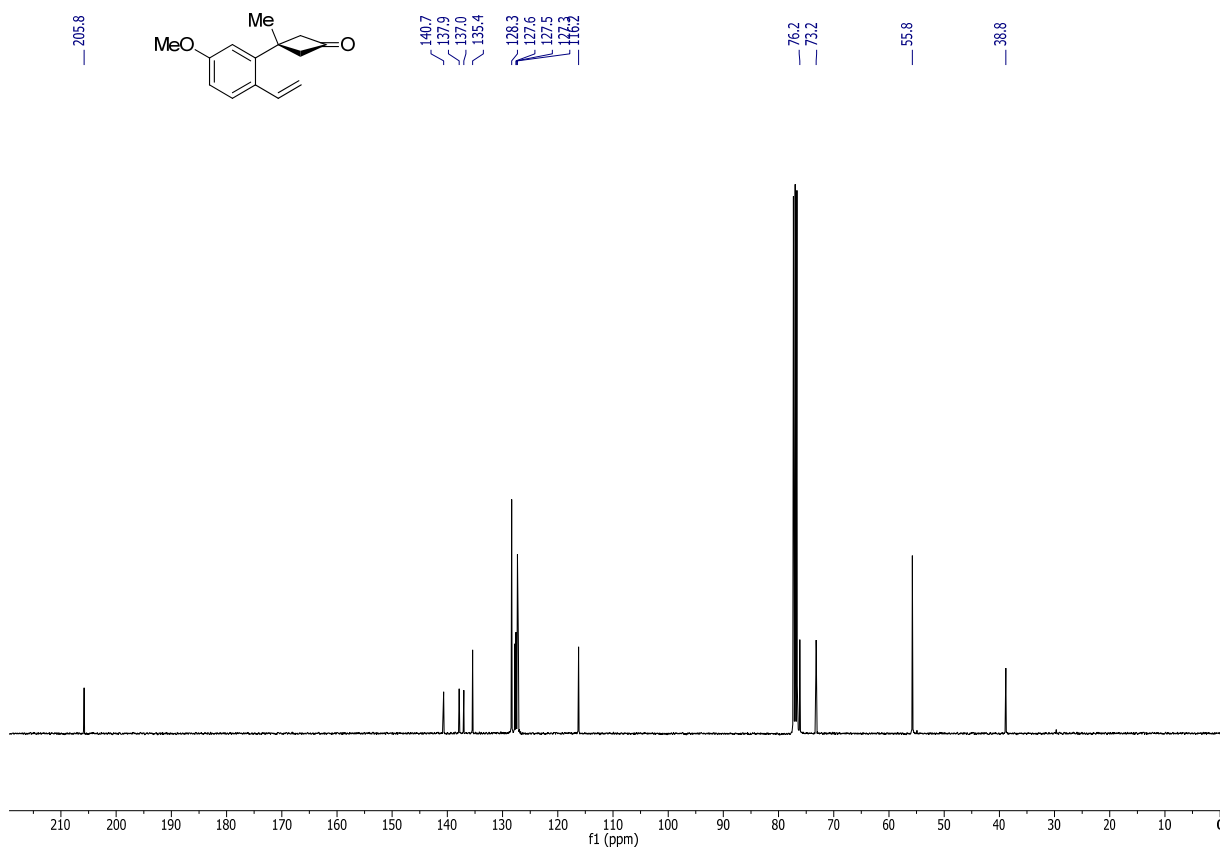

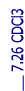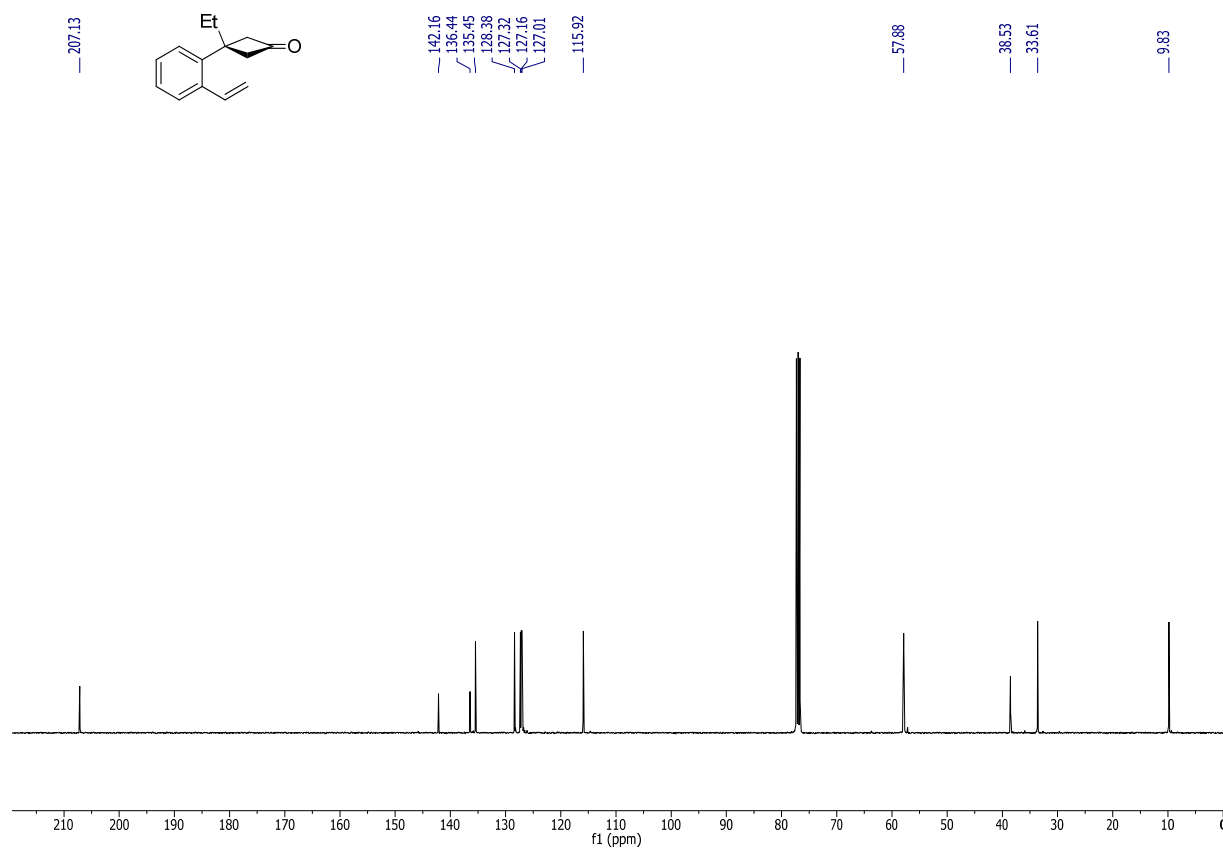

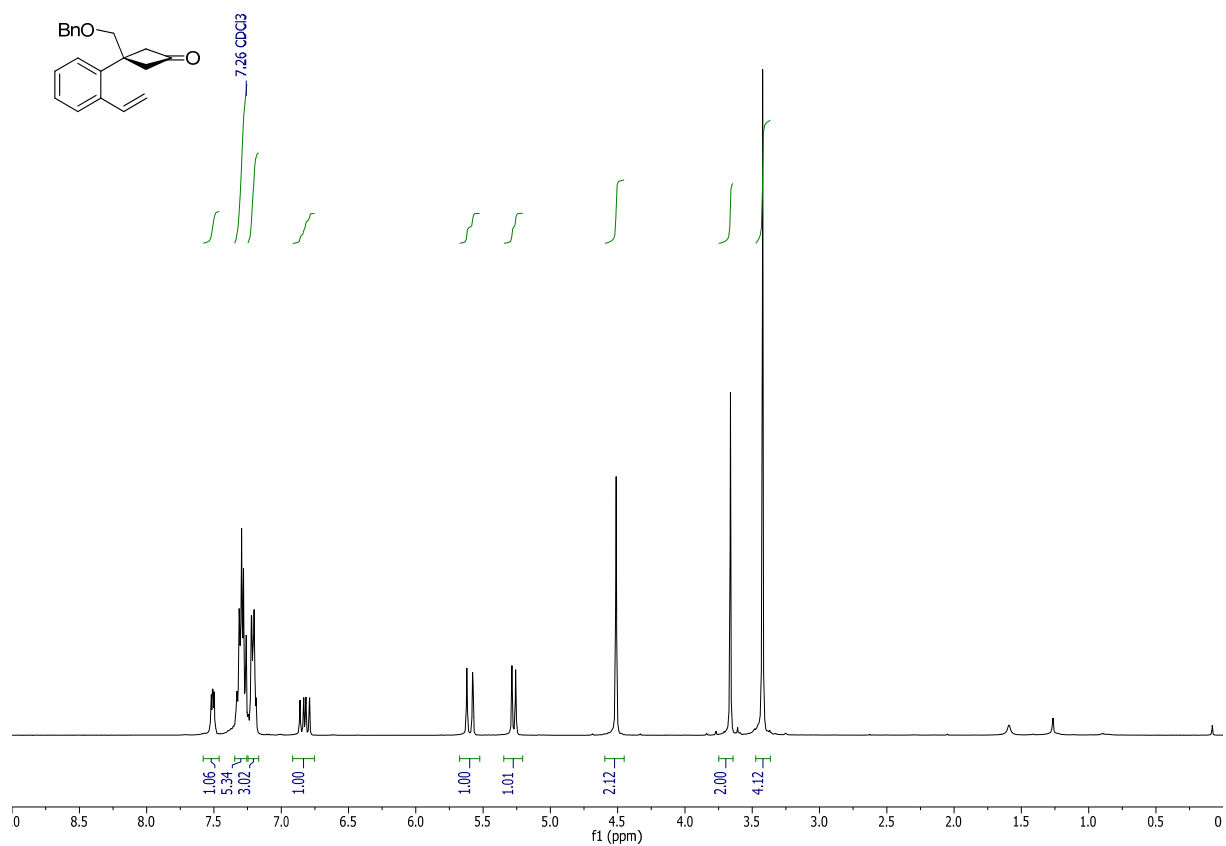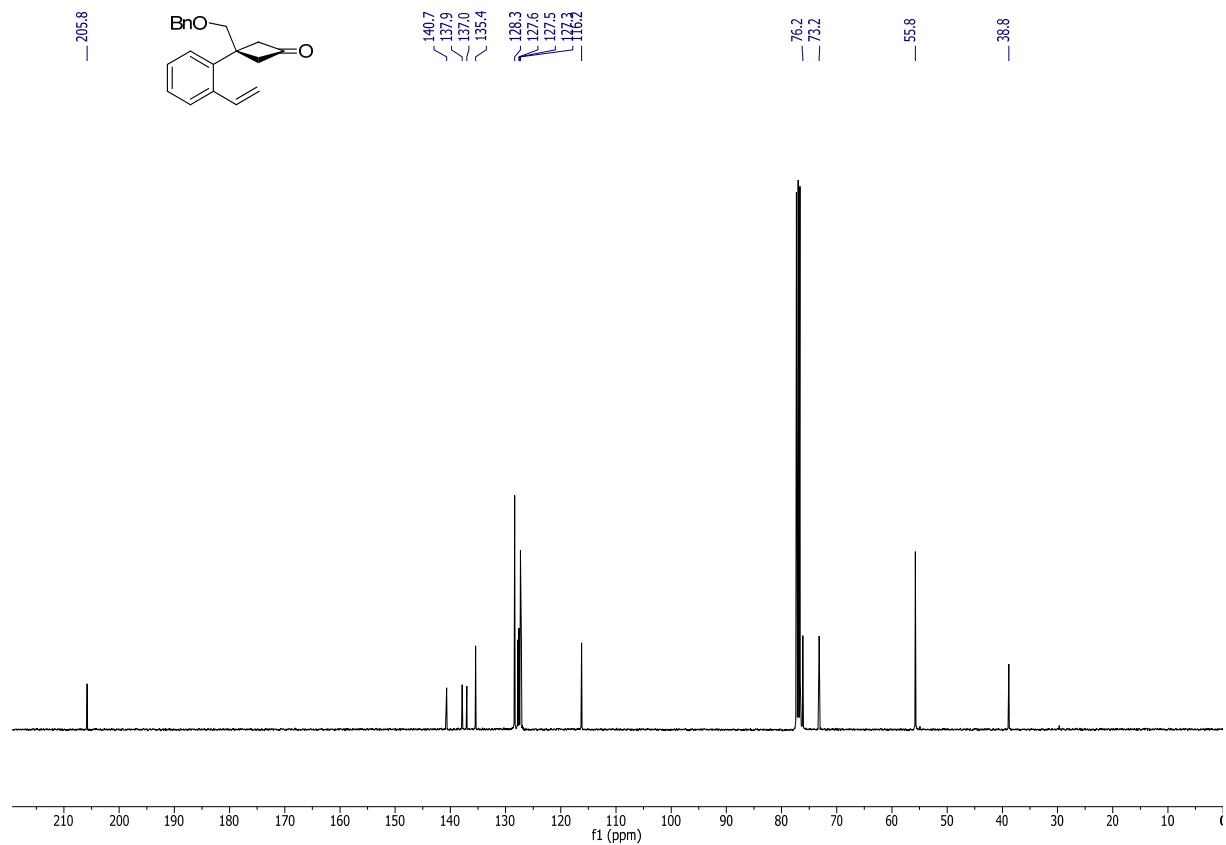

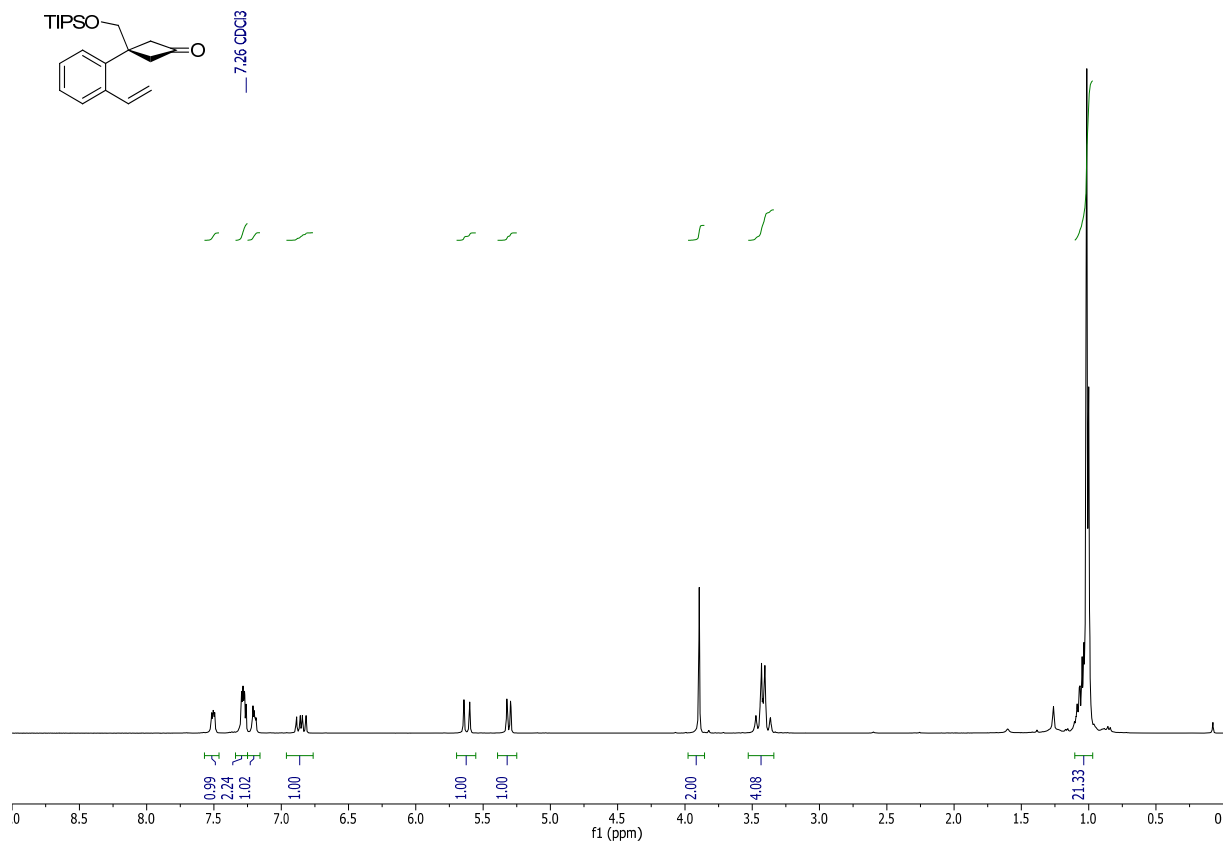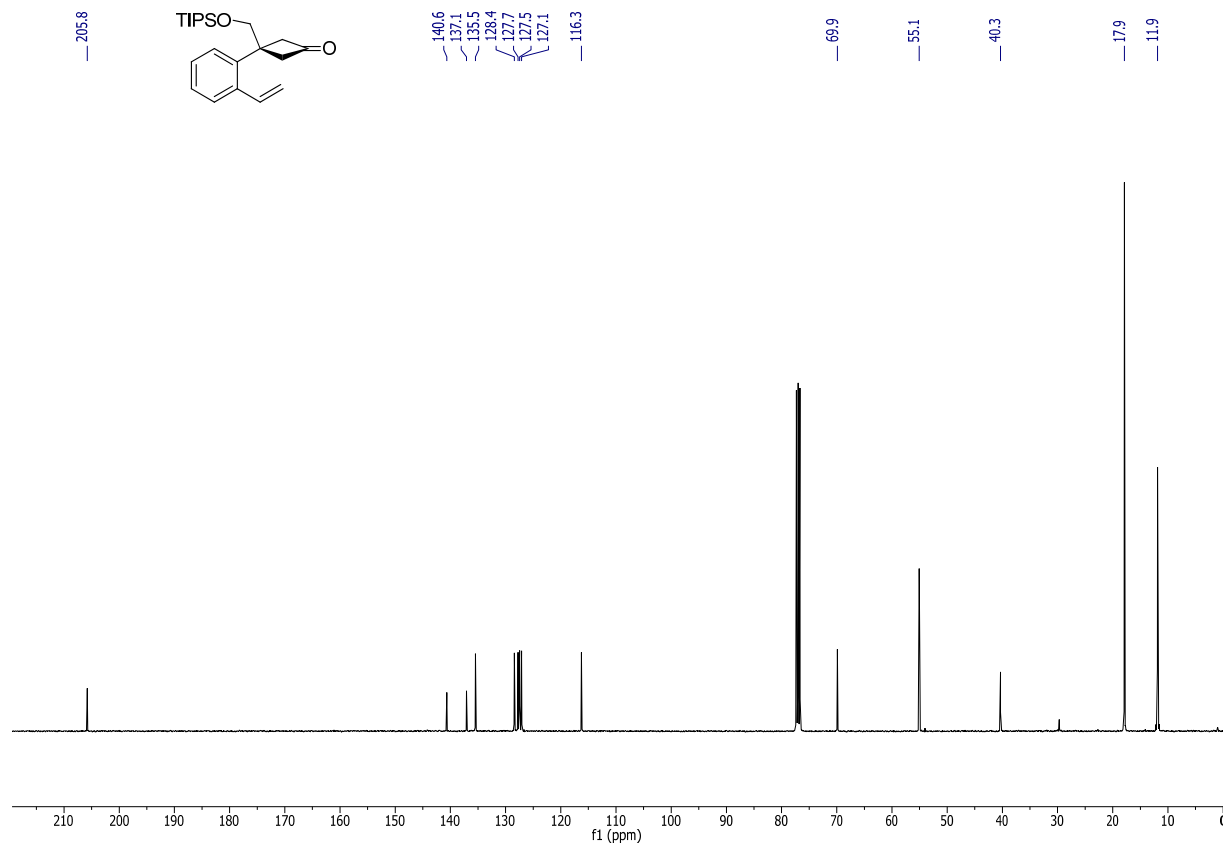

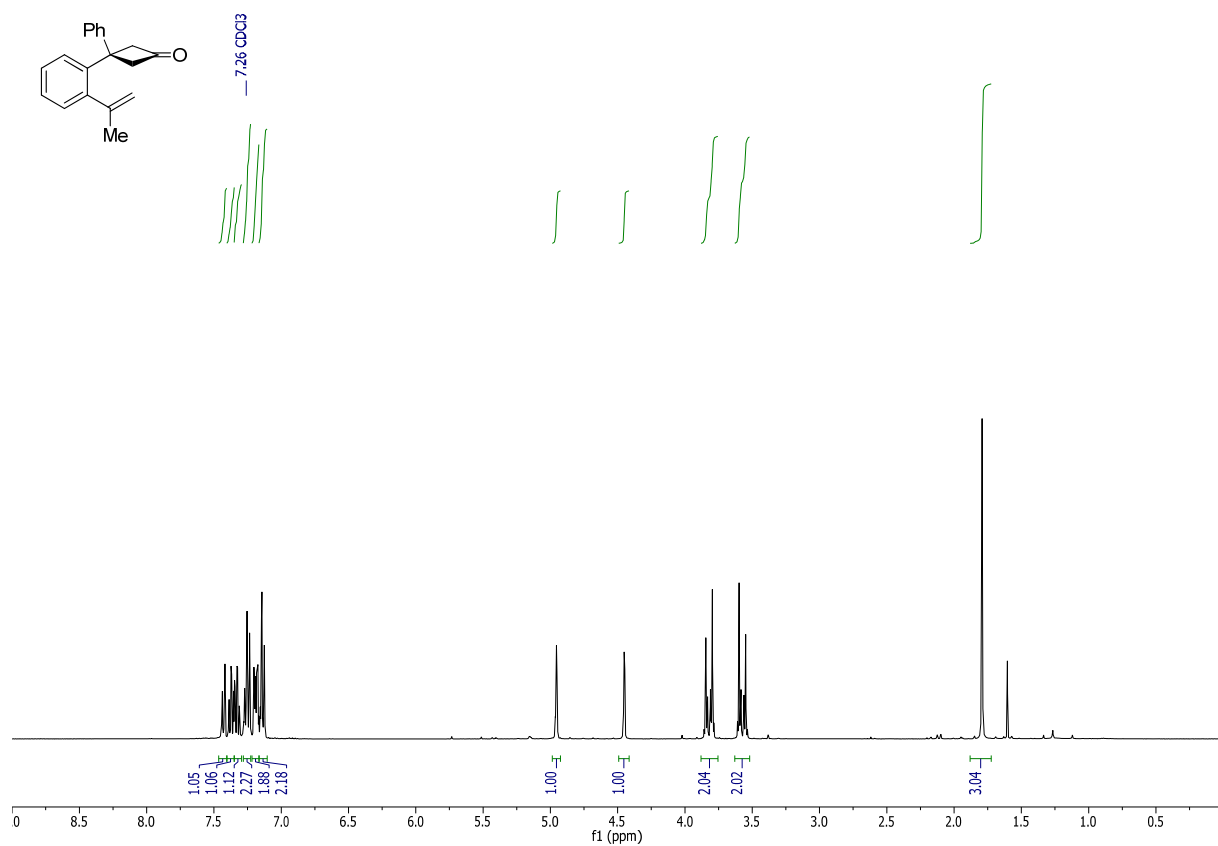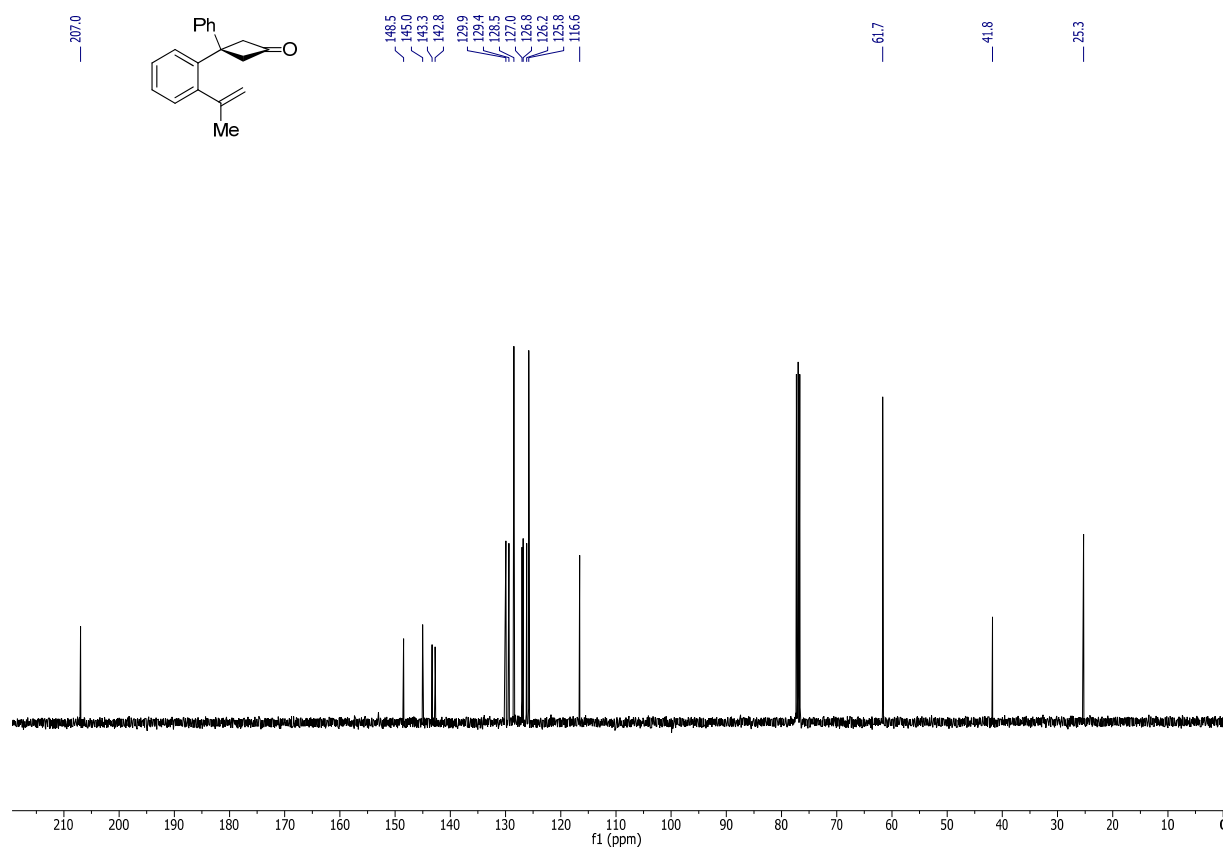

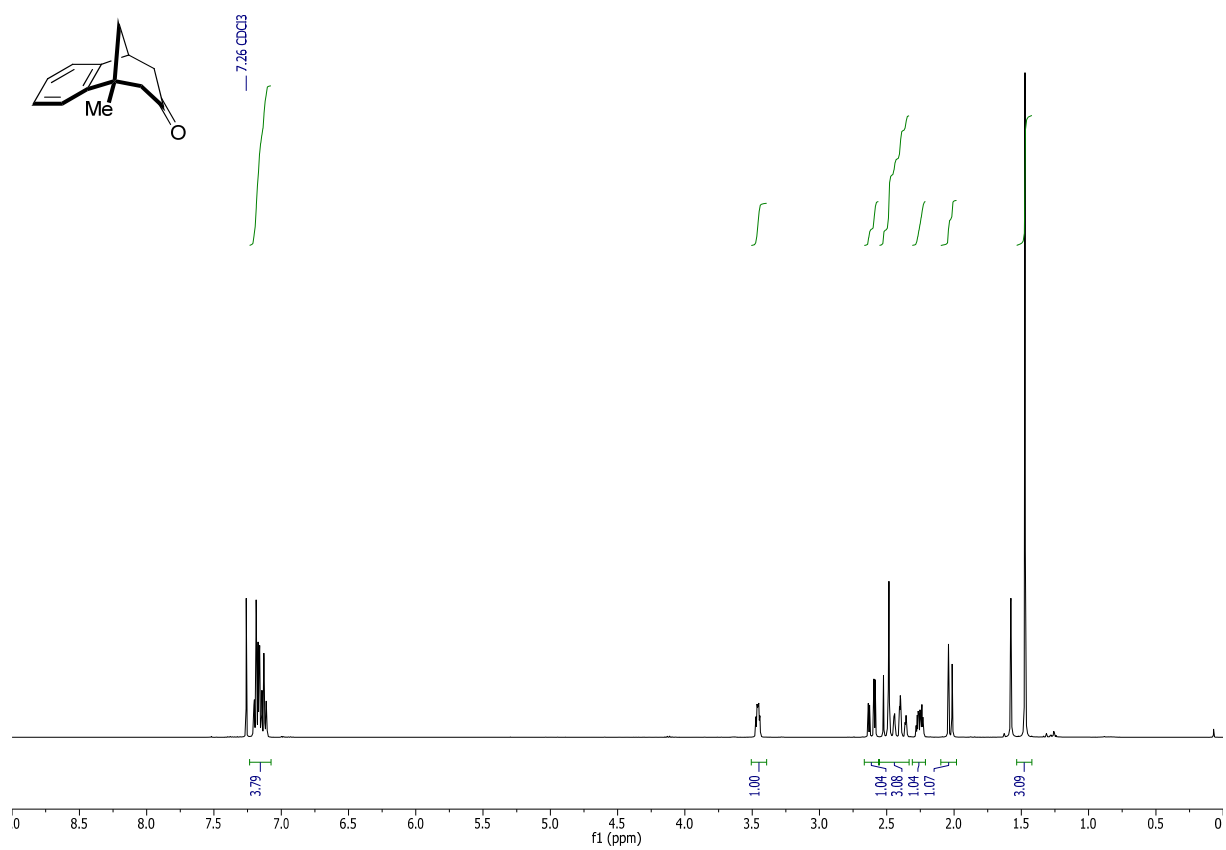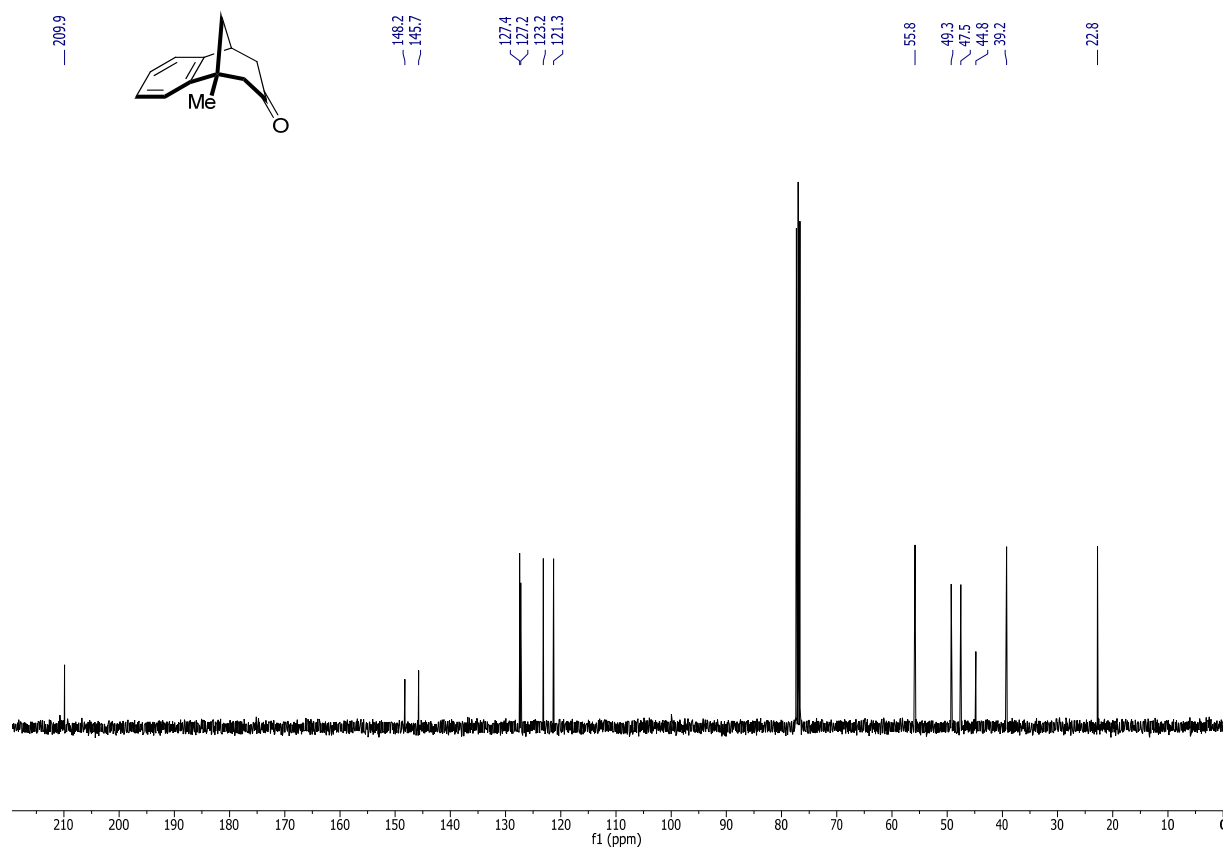

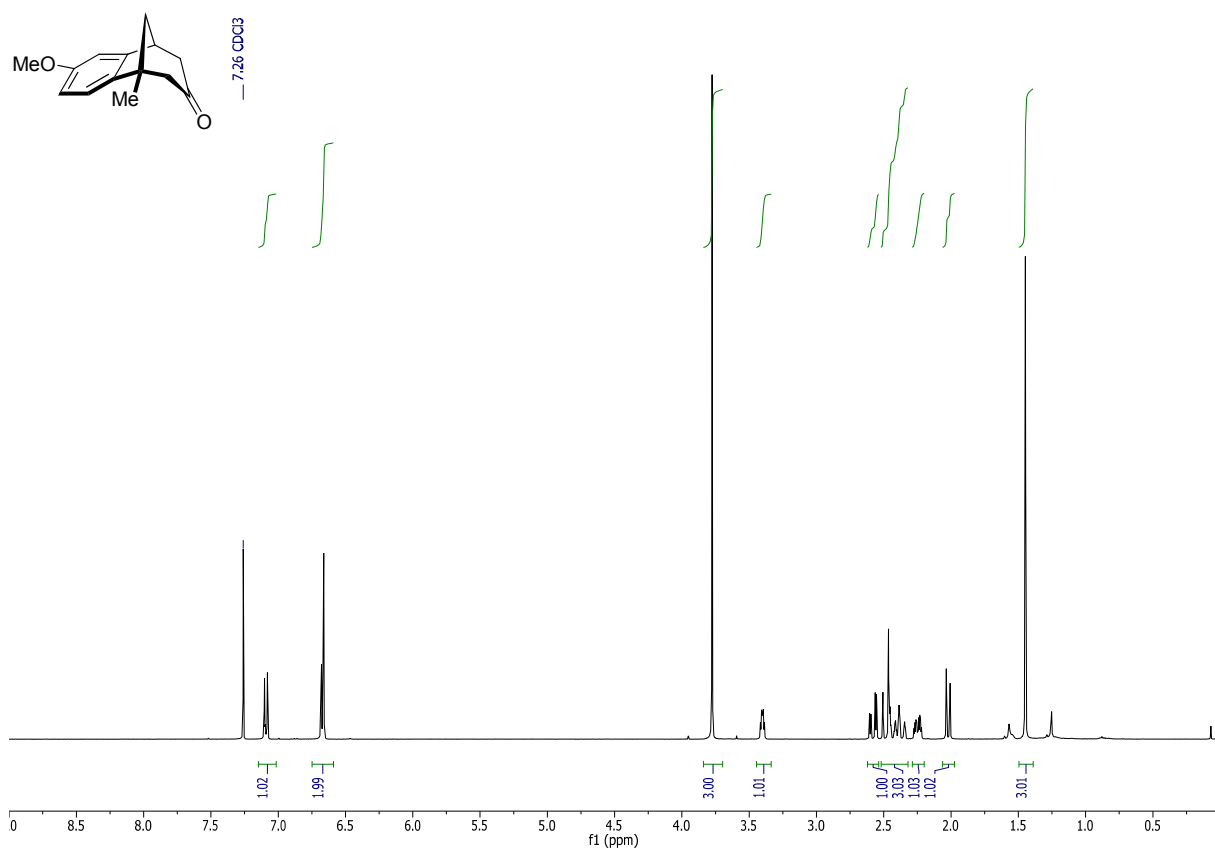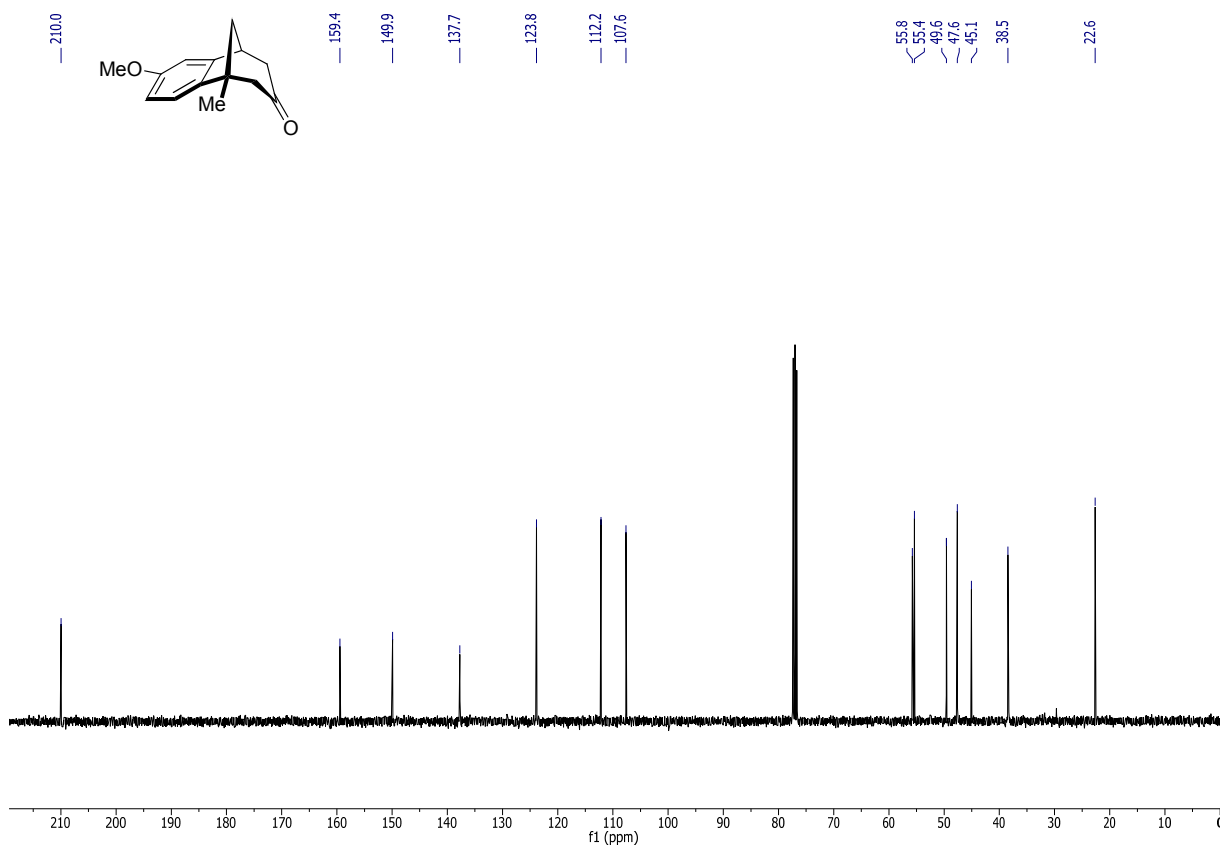

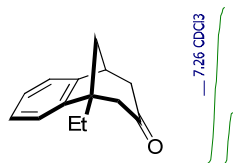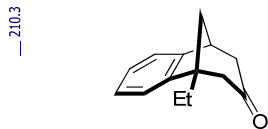



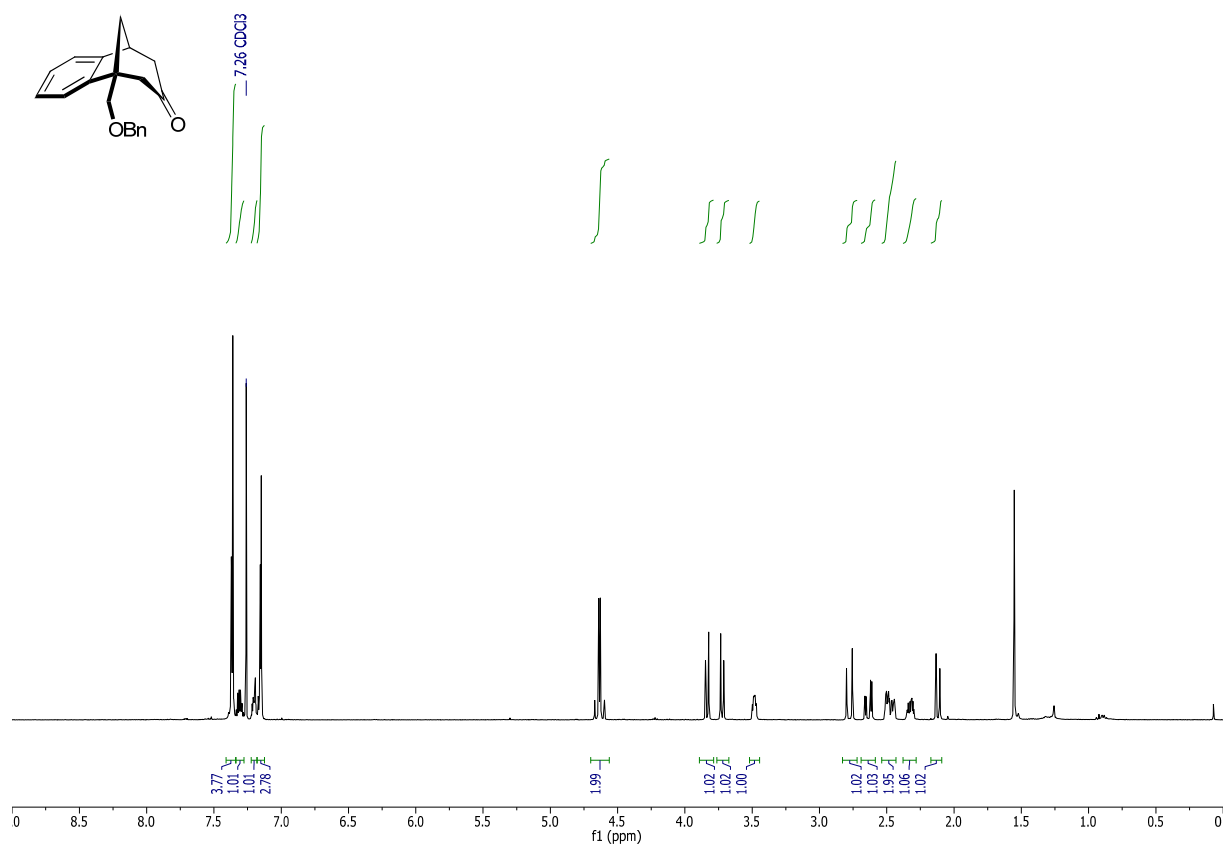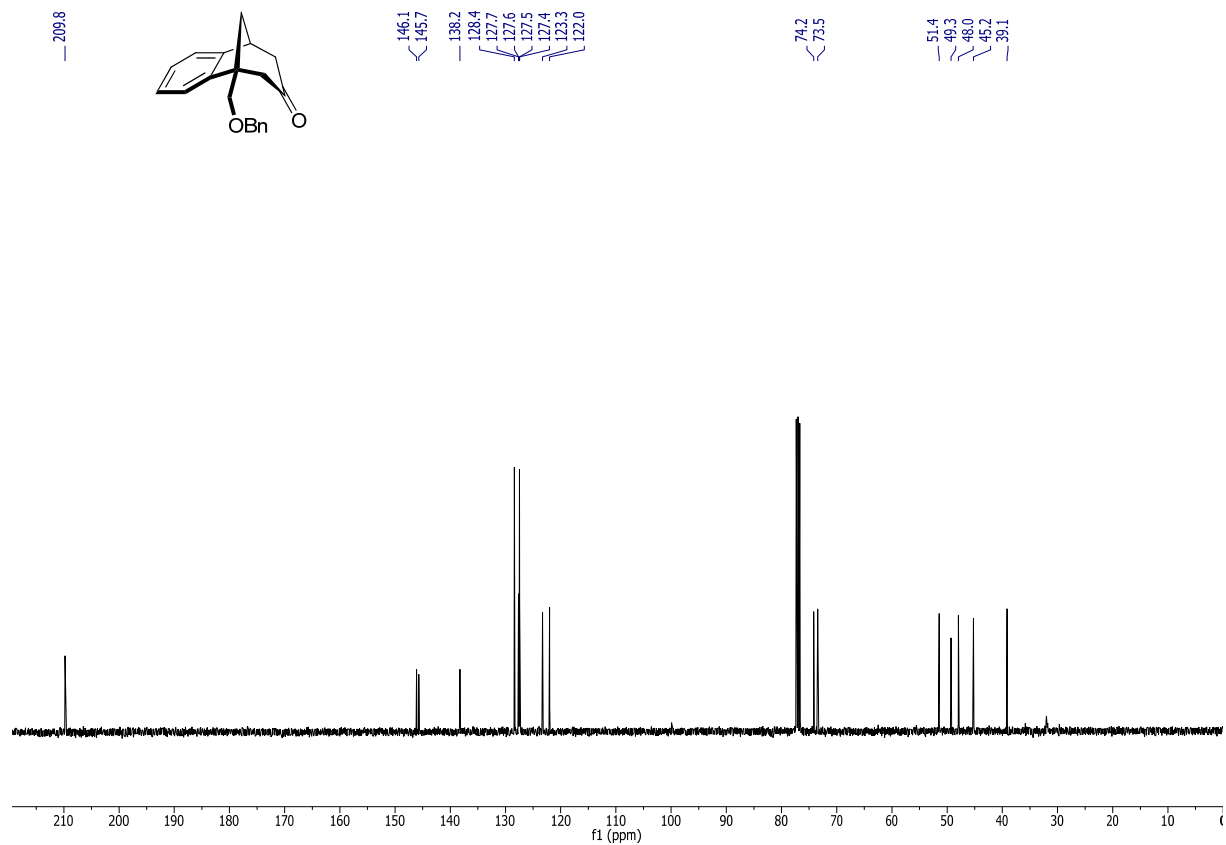

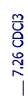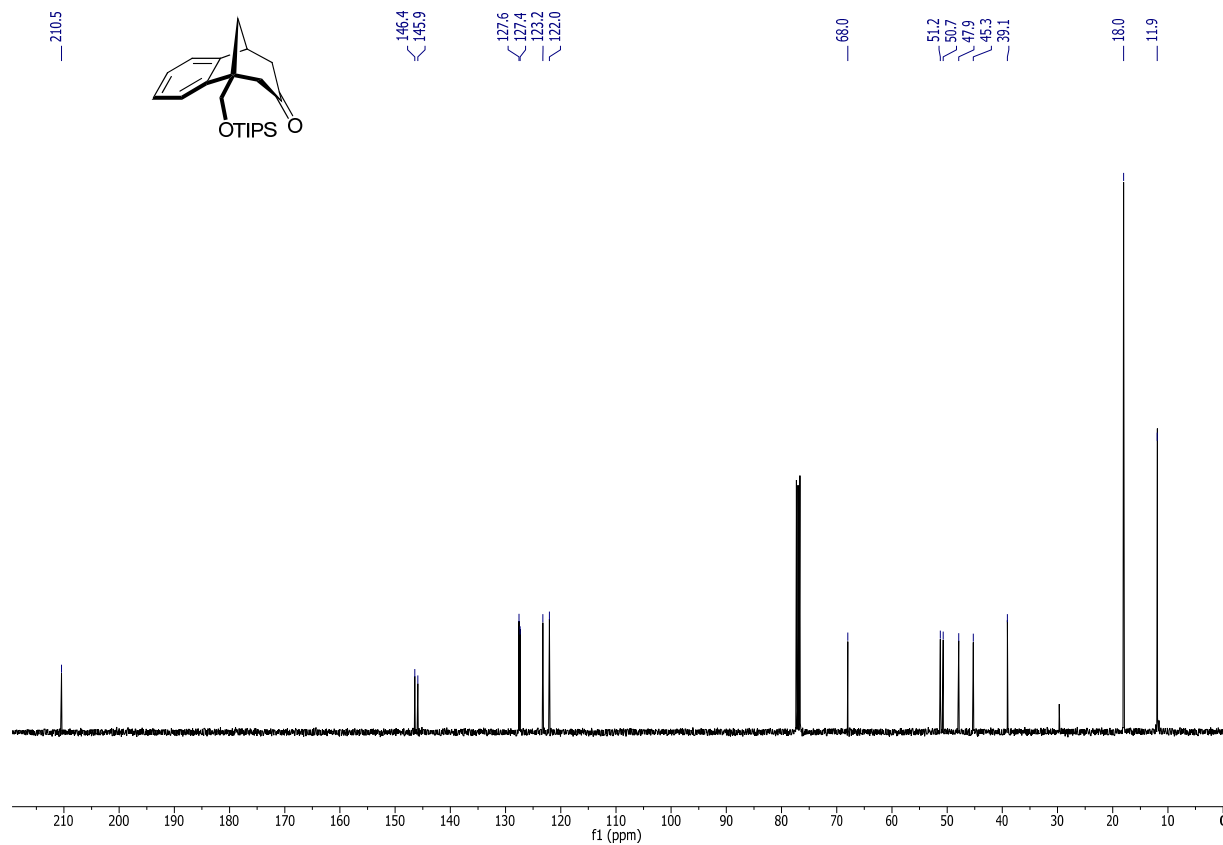

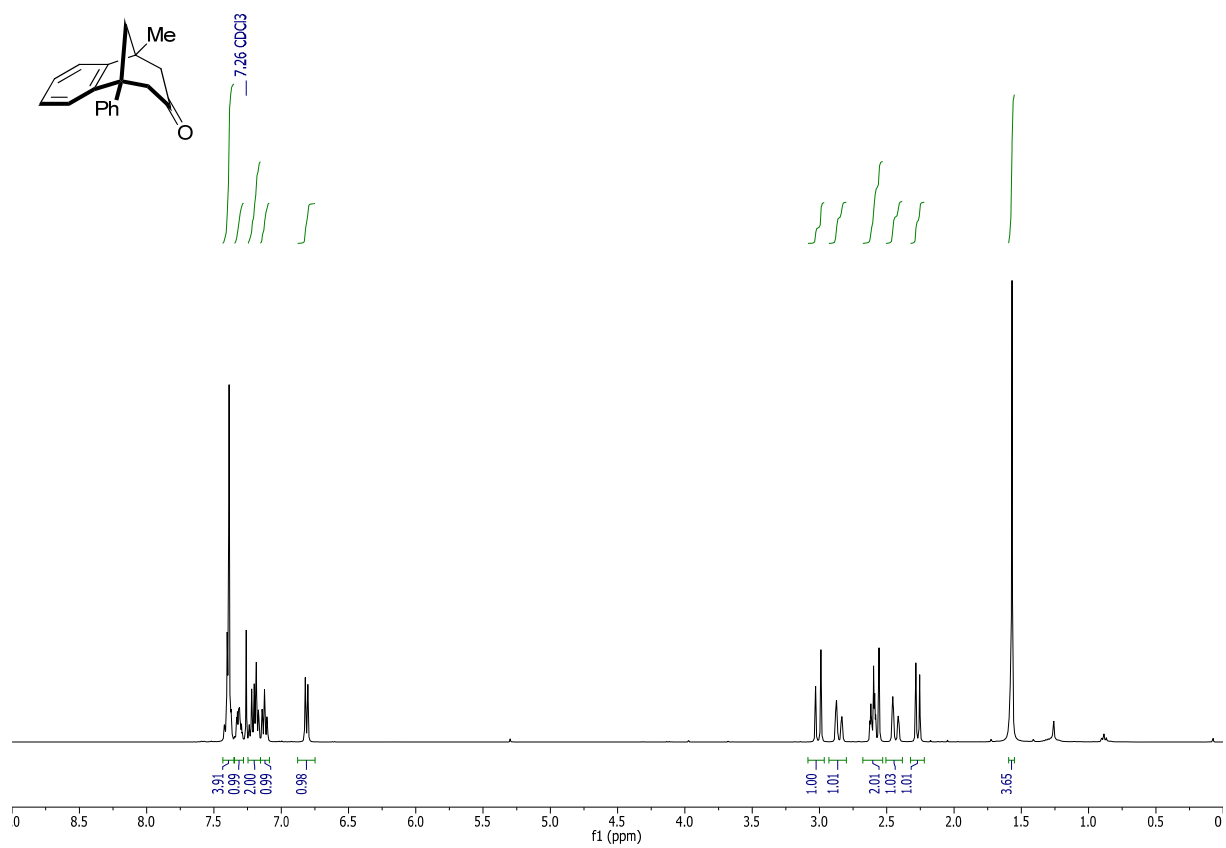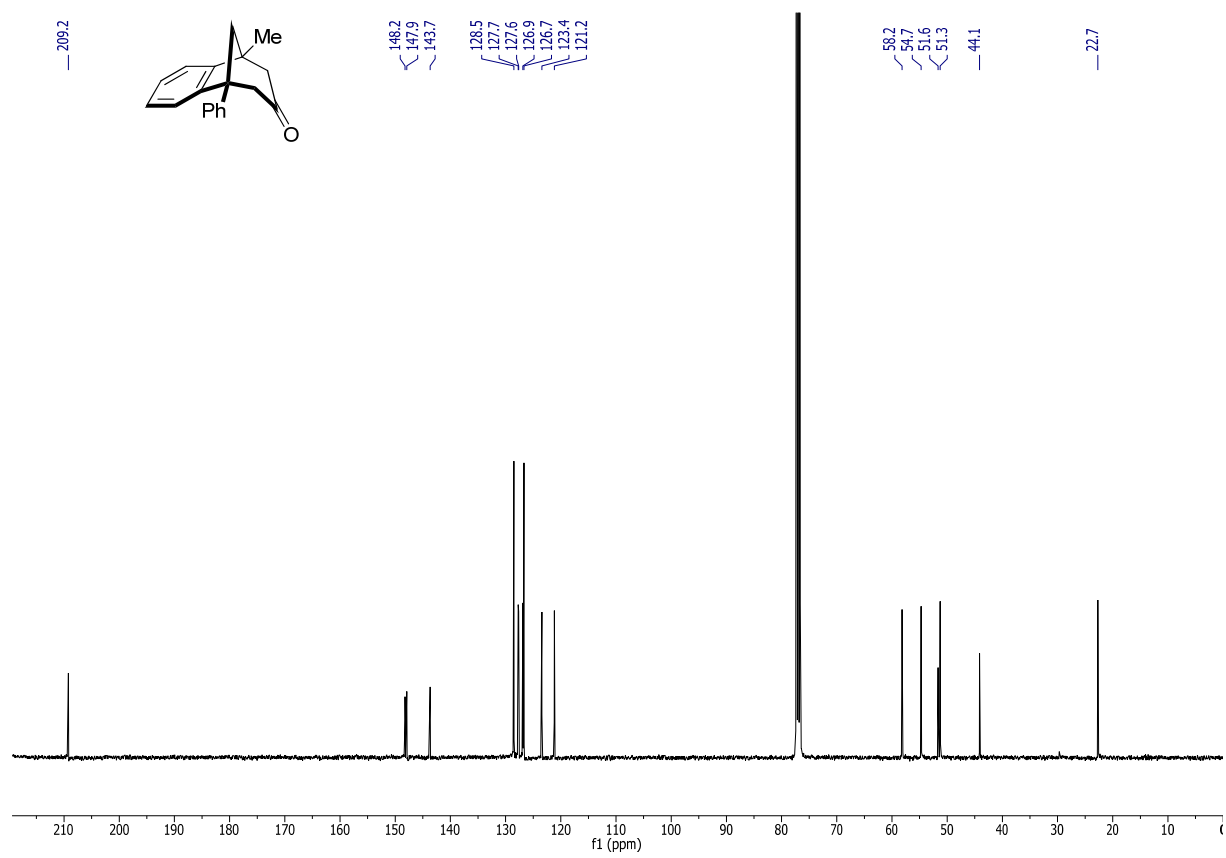

Supplement: Supplementary file 1 [file 3962308]
